# Supplementary material for: Involvement of the miR156/SPL module in flooding response in Medicago sativa
Source: PubMed Central journal article supplement (PMC7864954; doi:10.1038/s41598-021-82450-7), 2021-02-05
Supplement: 41598_2021_82450_MOESM2_ESM.pdf [file 41598_2021_82450_MOESM2_ESM.pdf]

**Involvement of the miR156/SPL module in flooding response in *Medicago sativa***

Biruk A. Feyissa<sup>1,2</sup>, Lisa Amyot<sup>1</sup>, Vida Nasrollahi<sup>1,2</sup>, Yousef Papadopoulos<sup>3</sup>, Susanne E. Kohalmi<sup>2</sup>, Abdelali Hannoufa<sup>1,2,\*</sup>

<sup>1</sup> Agriculture and Agri-Food Canada, 1391 Sandford Street, London, Ontario, N5V 4T3, Canada

<sup>2</sup> Department of Biology, University of Western Ontario, 1151 Richmond Street, London, Ontario, N6A5B7, Canada

<sup>3</sup> Agriculture and Agri-Food Canada, 58 River Road, Truro, Nova Scotia, B2N 5E3, Canada

\* Corresponding author email: [Abdelali.Hannoufa@canada.ca](mailto:Abdelali.Hannoufa@canada.ca)

**Table S1. List of primers used in the study**

| No. | Gene name                                                              | Abbreviation | Forward primer sequence   | Reverse primer sequence  | Plant                | Use              | Source                      |
|-----|------------------------------------------------------------------------|--------------|---------------------------|--------------------------|----------------------|------------------|-----------------------------|
| 1   | miR156                                                                 | miR156       | cctatctctgctgtgacct       | agcaccacctccaataacata    | <i>Arabidopsis</i>   | qRT-PCR          |                             |
| 2   | KIN10 (At3g01090)                                                      | KIN10        | agaatgatggcactgtgacg      | acaggtgaagcaacgctt       | <i>Arabidopsis</i>   | qRT-PCR          | Baena-González et al., 2007 |
| 3   | KIN11(At3g29160)                                                       | KIN11        | ccgtgtccaagtggtactc       | acatgtcaggaatccagtg      | <i>Arabidopsis</i>   | qRT-PCR          | Baena-González et al., 2008 |
| 4   | senescence-associated protein 1, DIN1 (At4g35770)                      | DIN1         | cagagtcggatcaggaatgg      | atttgaccgtctccaacc       | <i>Arabidopsis</i>   | qRT-PCR          | Baena-González et al., 2009 |
| 5   | DIN3 (At3g06850)                                                       | DIN3         | tcagctcgtcatctgtttgc      | atcaaatgtggagggtgaac     | <i>Arabidopsis</i>   | qRT-PCR          | Baena-González et al., 2010 |
| 6   | glutamine-dependent asparagine synthetase dark inducible 6 (At3g47340) | DIN6         | aacttgcgcagatcaagg        | ggaacacgtgccttagtcc      | <i>Arabidopsis</i>   | qRT-PCR          | Baena-González et al., 2011 |
| 7   | raffinose synthase familydarkinducible 10 (At5g20250)                  | DIN10        | gattcttctgtctgctgacct     | ttagcaagctgacaccatcac    | <i>Arabidopsis</i>   | qRT-PCR          | Baena-González et al., 2012 |
| 8   | SNF1-related kinase (Medtr1g034030)                                    | SnRK1        | ggagaccctgcacagagaat      | ctgaaactgctcgttgtt       | <i>M. truncatula</i> | qRT-PCR          |                             |
| 9   | SNF1 alpha kin 11 (Medtr6g048250)                                      | SnRK1-KIN11  | ttctggttgagccgtatcc       | gttgctctattcctactctt     | <i>M. truncatula</i> | qRT-PCR          |                             |
| 10  | SNF1-related kinase beta (Medtr5g098510)                               | SnRK1-b1     | ggccttctaagagtaggtcaa     | actcaggagcatgtgtccatt    | <i>M. truncatula</i> | qRT-PCR          |                             |
| 11  | SNF1-related kinase beta 2 (Medtr2g095290)                             | SnRK1-b2     | tcggctactctgtaatgct       | gcgatgagtgatcccaag       | <i>M. truncatula</i> | qRT-PCR          |                             |
| 12  | SNF1 gamma subunit (Medtr4g103550)                                     | SnRK1-g      | tttcatgggctcctgctt        | aaccaagtctaccacaggaac    | <i>M. truncatula</i> | qRT-PCR          |                             |
| 13  | SNF2, helicase and zinc finger protein (Medtr2g012830)                 | SnRK2        | aagaccaaaagcacacga        | aaagaggaaacccagca        | <i>M. truncatula</i> | qRT-PCR          |                             |
| 14  | Snorkel                                                                | SnorkelERF   | ttccagaggagggtagttaaga    | ttgggtgcacagatgattcc     | <i>M. sativa</i>     | qRT-PCR          |                             |
| 15  | MsSPL1 (Medtr2g046550)                                                 | MsSPL1       | agggttggagatgaacgatg      | cacaggcgaatcttgtct       | <i>M. truncatula</i> | qRT-PCR          |                             |
| 16  | MsSPL1a (Medtr7g110320)                                                | MsSPL1a      | gtgaggagaatagcaggcagt     | cccacagcatcaggtctaaa     | <i>M. truncatula</i> | qRT-PCR          |                             |
| 17  | MsSPL2                                                                 | MsSPL2       | gtagaagaggaggagggtgatg    | gcaacagggtgggaaacac      | <i>M. sativa</i>     | qRT-PCR          | Gao et al., 2016            |
| 18  | MsSPL2a (Medtr8g080680)                                                | MsSPL2a      | gctgcagacgacaacttca       | catctgttctcccacac        | <i>M. truncatula</i> | qRT-PCR          |                             |
| 19  | MsSPL4                                                                 | MsSPL4       | atgcaaaagcacctaccgt       | cctctcattatgccagcca      | <i>Msativa</i>       | qRT-PCR          | Gao et al., 2016            |
| 20  | MsSPI7 (Medtr2g020620)                                                 | MsSPL7       | ccctgaactcgtatcttgt       | gccgtgatgatagccttca      | <i>M. truncatula</i> | qRT-PCR          |                             |
| 21  | MsSPL7a (Medtr7g444860)                                                | MsSPL7a      | cagggcacacatgagagaaga     | gccatgatcagtcagat        | <i>M. truncatula</i> | qRT-PCR          |                             |
| 22  | MsSPL8 (Medtr8g005960)                                                 | MsSPL8       | tggccgacctactctctct       | aaccttggctgacaccta       | <i>M. truncatula</i> | qRT-PCR          |                             |
| 23  | MsSPL9                                                                 | MsSPL9       | ggaagaggtggctcagttca      | acagtaaacgttggcacttag    | <i>Msativa</i>       | qRT-PCR          | Aung et al., 2015b          |
| 24  | MsSPL13                                                                | MsSPL13      | caccatggagtggaattgaaagc   | ctattcccattgataggaaatagt | <i>Msativa</i>       | qRT-PCR          | Aung et al., 2015b          |
| 25  | MsSPL13a (Medtr8g096780)                                               | MsSPL13a     | cttgggttggaggatgtt        | gctgctggttgaagatgtt      | <i>M. truncatula</i> | qRT-PCR          |                             |
| 26  | MsSPL14 (Medtr1g035010)                                                | MsSPL14      | gatctccaacatcggtctca      | gagcttcgcaaccttatga      | <i>M. truncatula</i> | qRT-PCR          |                             |
| 27  | MsSPI16 (Medtr7g028740)                                                | MsSPI16      | tttgactcgggtgtgctct       | cgttcacagcaagattgtg      | <i>M. truncatula</i> | qRT-PCR          |                             |
| 28  | MsSPL7a (Medtr7g444860)                                                | MsSPL7aGSP   | gagctcccattgattctgtt      | -                        | <i>M. truncatula</i> | 5' RLM-RACE      |                             |
| 29  | MsSPL7a (Medtr7g444860)                                                | MsSPL7aGIP   | -                         | cctagccattatcgtatctc     | <i>M. truncatula</i> | 5' RLM-RACE      |                             |
| 30  | MsSPL7a (Medtr7g444860)                                                | MsSPL7aGOP   | -                         | ctgcaaatgccattctctgtct   | <i>M. truncatula</i> | 5' RLM-RACE      |                             |
| 31  | MsSPL8 (Medtr8g005960)                                                 | MsSPL8GSP    | atggagggtcatcaactgct      | -                        | <i>M. truncatula</i> | 5' RLM-RACE      |                             |
| 32  | MsSPL8 (Medtr8g005960)                                                 | MsSPL8GIP    | -                         | cacgaagtcaatggctctgt     | <i>M. truncatula</i> | 5' RLM-RACE      |                             |
| 33  | MsSPL8 (Medtr8g005960)                                                 | MsSPL8GOP    | -                         | ttcgaagaacctgtggaacc     | <i>M. truncatula</i> | 5' RLM-RACE      |                             |
| 34  | MsSPL13a (Medtr8g096780)                                               | MsSPL13aGSP  | tcctagatcgcacgttttag      | -                        | <i>M. truncatula</i> | 5' RLM-RACE      |                             |
| 35  | MsSPL13a (Medtr8g096780)                                               | MsSPL13aGIP  | -                         | caggatgatcatgttgtt       | <i>M. truncatula</i> | 5' RLM-RACE      |                             |
| 36  | MsSPL13a (Medtr8g096780)                                               | MsSPL13aGOP  | -                         | ccactctgatcattgaacca     | <i>M. truncatula</i> | 5' RLM-RACE      |                             |
| 37  | Zinc finger protein SERRATE (SE) (Medtr8g043980)                       | SE           | caccatggcagaagtctcacc     | tatcacggtagctcttctgt     | <i>M. truncatula</i> | Yeast-two-hybrid |                             |
| 38  | Zinc finger protein SERRATE (SE) (Medtr3g006760.1)                     | SE           | caccatggccgaagtcgaaaaatct | gtcttgataactccgatcc      | <i>M. truncatula</i> | Yeast-two-hybrid |                             |
| 39  | DCL protein (Medtr3g102270.2)                                          | DCL1         | caccatggccgcaccactctct    | ccaacaggccttagtactctg    | <i>M. truncatula</i> | Yeast-two-hybrid |                             |
| 40  | SNF1-related kinase (Medtr1g034030.1)                                  | SnRK1        | caccatggatcctactatgaacca  | ctctgctcattctctatcga     | <i>M. truncatula</i> | Yeast-two-hybrid |                             |
| 41  | Acetyl CoA Carboxylase I                                               | <i>Acc1</i>  | gatcagtgaaactcgcaaaagtac  | caacgacgtgaacactacaac    | <i>M. sativa</i>     | qRT-PCR          |                             |
| 42  | Actin                                                                  | <i>Actin</i> | tcaatgtcctgcatgtatgt      | actcacacctcaccagaatcc    | <i>M. sativa</i>     | qRT-PCR          |                             |

Table S2. The matching gene IDs of the newly identified MsSPLs in the tetraploid alfalfa genome

| MsSPL | Chromosome | Gene ID       | MsSPL | Chromosome | Gene ID       |
|-------|------------|---------------|-------|------------|---------------|
| 1     | 2.1        | MS.gene98509  | 7a    | 7.4        | MS.gene93246  |
| 1     | 2.2        | MS.gene033954 | 8     | 8.2        | MS.gene61571  |
| 1     | 2.3        | MS.gene59294  | 8     | 8.3        | MS.gene000259 |
| 1     | 2.4        | MS.gene76798  | 8     | 8.4        | MS.gene022540 |
| 1a    | 7.1        | MS.gene050425 | 8     | 8.4        | MS.gene62778  |
| 1a    | 7.2        | MS.gene28650  | 13a   | 4.1        | MS.gene40685  |
| 1a    | 7.3        | MS.gene050856 | 13a   | 4.2        | MS.gene030560 |
| 1a    | 7.4        | MS.gene043764 | 13a   | 4.3        | MS.gene79945  |
| 2a    | 4.2        | MS.gene023425 | 13a   | 4.4        | MS.gene030453 |
| 7     | 2.1        | MS.gene002799 | 14    | 1.1        | MS.gene026366 |
| 7     | 2.2        | MS.gene96180  | 14    | 1.2        | MS.gene040800 |
| 7     | 2.3        | MS.gene00967  | 14    | 1.3        | MS.gene061710 |
| 7     | 2.4        | MS.gene004483 | 14    | 1.4        | MS.gene061104 |
| 7a    | 7.1        | MS.gene36181  | 16    | 7.1        | MS.gene000446 |
| 7a    | 7.2        | MS.gene010796 | 16    | 7.2        | MS.gene99828  |
| 7a    | 7.3        | MS.gene38329  | 16    | 7.3        | MS.gene001948 |

**Table S3 coding sequences used for yeast-two-hybrid assay between SnRK1 and miR156 biogenesis genes**

>Medtr8g043980.1 (zinc finger protein SERRATE (SE) (Medtr8g043980)

```
atggcagaagtctcccccattccctccgattccctccgacaaatctccccaccaccacctccccccaccaccgctcccaaccaccacaatcacctctcccacctccgccccgattccgatctccctaccaccaccacaatctctccgcccgcaga
gactaccgcccgcgatgatagagatagagatttccatgctctccctccgcccgcgagattatgaccgctaaacacatctccctccgagggatagagatagagatttcaaacgcagggcgtggtccagctctccctccatctgtagccgcccgtcattaccacca
atgccaaagctcccccccatataataattataaacctccagagagaggtggtagtccccgctggcgggtatggaccgctgatagatctgaaatgataaattccgctgggtatgaaaggggtggaagaggtggttatgataggggtggaagaggtcctatgat
aggggtggacaggtggtaaatgataggggtggaagaggtggctatgataggggtggaagaggtggtagtggtagacaggtcttatggtaggtttggaatcgtctctggaggagatcaaaatgggtctctggtaggaaatccaatcgtggtagcagac
ttgccaagtggcgtggccaaagagaaggttggatgctcctataaacaattcctcagagctggagagctgataactcacaactgaaagcagaacaggtcaagaatcaaaatcagagttatttctcacaacaaagagcttattcagctcctaaagat
gagaggtggtgaaagataaataatcctcccaaaaatttgcatacagctcattgaaaggagaaatgaaagctcgcagacgtgccaaagatttttctgctgattgcaaaagtgaaacattagatccaaatccgggtttaaagtcctctttaccagaaatcaggg
caagctagcagacaaaattcagagggagaaagcggaaagcacaagaagaagagatgggtgggttctaaatataaaagtagtattctcagctgctccaaagctcactcctgctgctgaaaccaagacagaaatcacaagcagatgtcaaacagctcaggccttgt
cgcagctgacacagaaagaggtatggagataatatttatcagcagatcattataagagcctgacatctgtaaggggtttagaaggtgtagcttttgaccacactgatatactctgtagcagatcactgtagctgtagatattatggcagattgagact
aatgaggtcaaggttttaggcattgtagccagaagaaagggcagaaagaaacaggttaaatcagggctgaaatgggaaagaaactgacatctttgaccaggaaggtgaaatggtagcagatccattggaagtagctgctaaaggaaaaatggatgct
gcagcaattgaagttggtagccatattgtagaaaaatcagggatgaaagatggatggaaatggttggtagcagtagggctgcacaaagcttttctatgctgctgaaatttggtagcaaaacatggaagcaaaagcctcagctgctctgaaacaaact
tcgaaatgctgtaggactcctataactcaatgaatgtagccagctcctggtagaaagcctgctcagcagcaactcagaagcaaacagggccttaaatcaaggttaggttttagggccgtagtagagatgatcgtggtaacgctcagagacatcctcagcagacat
gaacggtatgacagaaatgaatggagatagagctaaatccccctccgctgaaagcagctcaaaagcactgagatgggaacaaatgatgaaacaaatgcaagacacttttgacagggcctgggttctcctctttagctcagatattctccaccagattttagctct
gtacctggctggcccataggacctttgttctcctgctccaccagaagttgcattgagatgtagagatcaaggagacatctcattttgatggctcggaaataatgctgctgcccgcgcatcatatgggtggaccggccaataatctactctctcc
ccaggttttagaccagatcctccgaagatgcaagattatcaagatttggtagctccagacgaagaggtcaccgtgatagactatcggagtttggtaa
```

>Medtr3g006760.1 C2H2 zinc finger protein SERRATE (SE) ( Medtr3g006760.1)

```
atggccgaagtcgaaatctccctccgaaatcacacagcagcagatctcccaccatcacaccgctccaccctctccgacagcagatctcccacctccaccataatcccacacctcgtcgtcgcgatttccgacctcgtgacgacagagatttccgacctcctccac
cgtggccgcccgtggtggccgcccgtggcgggttactcaacaacacccgctgatagagacatcaaacgcccgtgtagtctcagccctaaactatcgtgaccgcccgttatctcctccctccgcaacagctcctcgttctcctccgcccgtataagagatcagaaggggt
agctccatagcctaacgacaggtttggccatgaccccttggctgctatgaaacggggaggtggaaaggggtggctatgacagatagacactggtagcagctggtagcagatttccacatcgatctggagggggatatacaaacgggaattctgatttggatgccaatcgccgt
tatcgagatttgcgaagttgggggtgctcgaagagagaggtttgatgctcctataagcaatcactccagagctgaaagatgatactgcccactcgaagctgagcgtagatcaaacagagtagcaagtagatattactcccaaaaagagcttatttcaatacc
caaacagctcgtgagttgaaagataaattatcaccacaatcttactacagtaattgaaagggagaaatgaaatgctcgcagctttggcaagaggttttctgctgatttgcgaagtgaaacatagacataaatccaggttaaaactcgcctccacataaa
tcagagcaagccactgagcccaattcagagggagaaacagatcggcgtggttaaaagaaagacatggcaggggactcaataaggaacaacagcttctcctcgtcctccgaagcctcaccctcgtcagttctgaaactagaagagtagcaagaagatattctcaggtt
cagcctggttctgctaaagctgacaagaaagggatgaagataaattttatgcaccaatgatcatgataaaaaatgtagcaagcctcgcagtggaatcgtggtggccctgtagtaattatccgctggcttaacatataaagggcttagaggggtttagctat
ctggacacgcttataacatctctggcggattcattggttagatattatgaaatgctgagactagtagccaaaggttttagcagtagtagcacaagagcaagcagtaggaacacagctaaagtcgggtcagaatgggagaaaaaactgtagctattctt
tggcagagaaggttggacgcccctggatcccttggaaatagagactgcaaaagagaagatagatgctgacagcgtgacatggttggatccatattgtagaaaaataggatgaaagatggttggaaatgctgctggagccaagaggtgcaacaagctttt
catcctgtaggttggtagtcaaaactcctcagctaaaaacccagagcctggttggaaactaacataaaatggcgggaagatcttatttcaaaaatcacatgaaatgctcctggtggaacccgctcactgacagcaatcaggcaaaaacttta
aagcgaaggttactggaagcggatgaaagatgactggtggaaatcggcagacagagataggagcagacagaacaaatggaaatagacactgacagttcgcctccatgagagcaggttgggaaacagctgtagcaatggtagcagattggtggaactgct
gtatcattcaactcagatagcccccctccctcagatttggatgctgctacactggcggccctctgggaccctttgtcctcctccaccagaagttgagtagcagatgatttagggatcaaggaccatctcgtatgactcaggaatgacgtagcgtctcgtgt
cctcacataggggacaagcctctatgattgctgttctcccaccctttagacctgatccccagcagtagcggagttatcaagactggatgcccagaagaagaagttactgtcatagactatcggagctttag
```

>Medtr3g102270.2 DCL protein (Medtr3g102270.2)

```
atggccgaccactcttctaaagcaagctctgttactctcgcgctgtttccataactcaacaacactcaccgctcagaacccgttaccgcccgcaccagcctatggtgacgcccgcgccatcaatccaccgctggaaaaacaaacgacaaaacactcactccggtt
agcaaacgcttaaacccggagagatgtttcccgctcagatcaactccggttggagagtagagaaatcctgattatgcaaaaatggaaagtagaaagagatgagatttcaatgatattgaaacctattatgtagctactaaaggaattcttctcattcaaatgatg
gatggagggacataacttggagagtagaanaactgtagtggaaagcctcttctgcttatctccacactctgaagataggatggatggttctgaaatccattatgatagactcaaaactatgaagctcagacacgggtgtagacacacatcatatccgacaca
ggtgcacgctaatccagagagatttggctcctactcagatagtagcaatcaaacagatactaaggcctgtttggataaaacactatttttacccttatag
```

>Medtr1g034030.1 SNF1-related kinase (Medtr1g034030.1)

```
atggatcctactatgaaactggtggacatggaaagtagaatatacagatattgcatgagagtagatagatagacttgcagctgatttctggaaatggagggcctaggtatgagagataaaacacactcaactggtgctgctcaagatatt
ggagaggtgataagtagatgaaatgtagcaagggaaatataaatacagatcactgagggcactcccactattgctcaggttcaagggtagaactctaccctacacatttagctatgttgatggaaatgctcctgggagagagctatttggagcaatagc
aatgcaagccttcaagcagagtagagccgctgtttctcccaacacttatcaaggggttagctactgctcgaatgcaagtagcactcgtgatttgaattggagaaatacattgctgtaggttagctcccgctcccggttggagatttggatttggg
tattcaagctcactgctacattcaacacaaaatcctaccgctcgtgaccctgcttatactcctcctgaagtttctcgaaaaagaaatcagatgcaagatgcaagatgctgctgctcgggggtgacctatgtagctggttgggtgcttactctt
gagagctcggagagcctcaaaaatttccggaagcattcattagatttggaaagcctcaactcaactcagcttagtattgctcaaatctcccgagctcctcagctcagagatctccttggagacatcctcagagaaataagcagtagcggagatcga
aacctgattggttttgaagaacctccagctgactcctcgtgggaaatcaacaagcagcagcttcaagagcctgaacacaaatgcaacaatgaaagaaatagcagataatagcagagctactattcagcagcgggaactcactcagctctcact
cagtagcttactgtagctggacatcagtagcaaaatggagcagagatagatactgactccgatctgtagatcagtagcagctggtgaaatgtagtatgcaatgtaa
```

The whole protein coding sequences of SnRK1 (Medtr1g034030.1), DICER-LIKE (DCL) (Medtr3g102270.2), and zinc finger protein SERRATE (SE) (Medtr8g043980) were amplified using gene specific primers (Table S1). The amplified coding sequences were cloned into the pENTR™ /D-TOPO® vector (Invitrogen) and transformed into *E. coli* by heat shock (42 °C for 90s). For subsequent Y2H assay, we used the ProQuest™ Two-Hybrid System (Invitrogen).

Table S4. Analysis of variance from physiological data obtained from the field experiment laid at Agriculture and Agri-Food Canada (AAFC) Research Centre in Kentville, Nova Scotia, Canada

| Source                                    | d.f. | Plant Ht, cm, 6wk post flood | Vigor, 0-4, 6wk post flood | DM, gm, 6wk post flood | Plant Ht, cm, 12wk post flood | Vigor, 0-4, 12wk post flood | DM, gm, 12wk post flood |
|-------------------------------------------|------|------------------------------|----------------------------|------------------------|-------------------------------|-----------------------------|-------------------------|
| Block:Plot stratum                        | *    | -                            | -                          | -                      | -                             | -                           | -                       |
| Flood                                     | 1    | ns                           | 0.089                      | ns                     | ns                            | 0.059                       | ns                      |
| Residual                                  | 6    | -                            | -                          | -                      | -                             | -                           | -                       |
| Block:Plot:Tray_ePlot stratum             | *    | -                            | -                          | -                      | -                             | -                           | -                       |
| Cultivar                                  | 15   | 0.003                        | 0.096                      | <0.001                 | 0.066                         | <0.001                      | 0.005                   |
| Flood:Cultivar                            | 15   | ns                           | ns                         | ns                     | ns                            | ns                          | ns                      |
| Residual                                  | 90   | -                            | -                          | -                      | -                             | -                           | -                       |
| Block:Plot:Tray_ePlot:Pouch:Plant stratum | *    | -                            | -                          | -                      | -                             | -                           | -                       |
| PPlant                                    | 7    | ns                           | 0.060                      | <0.001                 | ns                            | 0.003                       | 0.006                   |
| Flood:PPlant                              | 7    | 0.091                        | ns                         | ns                     | ns                            | ns                          | 0.082                   |
| Cultivar:PPlant                           | 105  | 0.076                        | ns                         | <0.001                 | <0.001                        | 0.034                       | <0.001                  |
| Flood:Cultivar:PPlant                     | 105  | 0.091                        | ns                         | <0.001                 | ns                            | ns                          | 0.061                   |
| Residual                                  | 667  | -                            | -                          | -                      | -                             | -                           | -                       |
| Total                                     | 1018 | -                            | -                          | -                      | -                             | -                           | -                       |

Table S5. Analysis of variance of hormone profiles in flood stressed and control alfalfa plants

| Hormone    | Genotype | trt      | Genotype*trt |
|------------|----------|----------|--------------|
| ABA        | 0.0123   | NS       | NS           |
| ABAGE      | 7.23E-07 | 2.57E-07 | 0.0305       |
| PA         | 0.00488  | 7.74E-06 | 0.02528      |
| Total ABA  | 0.00655  | NS       | 0.04869      |
| IAA        | NS       | NS       | NS           |
| Totalauxin | NS       | 0.0151   | NS           |
| GA19       | NS       | NS       | 0.0076       |
| TotalGA    | 0.041    | NS       | NS           |
| TotalCy    | 0.0253   | 8.40E-09 | 0.00988      |
| DPA        | 0.014654 | 0.000275 | 0.042277     |
| 7OHABA     | 0.014654 | 0.000275 | 0.042277     |
| tABA       | NS       | NS       | 0.0229       |
| cZOG       | 8.38E-05 | NS       | NS           |
| cZR        | 0.0277   | 1.99E-09 | 0.0105       |
| iPR        | 0.03413  | 2.39E-08 | 0.00908      |
| IAAAsp     | 7.54E-05 | 5.49E-10 | 0.000512     |

NS: Not significant at p<0.05

**Table S6. UHPLC-MS profiled hormones in ng/g dry weight up on flood stress in alfalfa leaf tissues**

| Phytohormones   | Abbreviations | Wild-type |         | AAC-Trueman |         | A8 (miR156OE) |         | <i>SPL13RNAi</i> |         |
|-----------------|---------------|-----------|---------|-------------|---------|---------------|---------|------------------|---------|
|                 |               | Control   | Flood   | Control     | Flood   | Control       | Flood   | Control          | Flood   |
| ABA metabolites | ABA           | 6129.42   | 2879.37 | 3436.01     | 2494.99 | 1118.73       | 1871.10 | 2795.64          | 3319.30 |
|                 | DPA           | 308.11    | 334.79  | 223.85      | 730.86  | 105.05        | 324.19  | 133.04           | 368.09  |
|                 | ABAGE         | 50.40     | 373.88  | 401.74      | 1073.29 | 110.15        | 423.27  | 47.52            | 329.98  |
|                 | PA            | 2724.02   | 2883.30 | 1173.19     | 3470.77 | 607.34        | 2252.90 | 758.16           | 2835.76 |
|                 | 7'OH-ABA      | 183.18    | 158.16  | 64.38       | 116.98  | 66.46         | 91.75   | 76.90            | 80.92   |
|                 | neo-PA        | 8.74      | ND      | 4.45        | ND      | ND            | ND      | 3.90             | 4.00    |
|                 | t-ABA         | 82.56     | 43.31   | 73.83       | 67.06   | 35.73         | 62.06   | 40.39            | 79.38   |
| Cytokinins      | t-ZOG         | ND        | ND      | 1.76        | ND      | 2.64          | 2.23    | 2.89             | 1.62    |
|                 | c-ZOG         | 18.75     | 17.43   | 6.69        | 9.59    | 13.49         | 14.02   | 16.47            | 14.97   |
|                 | t-ZR          | 1.00      | ND      | 0.95        | 0.90    | 2.40          | 1.50    | 1.00             | ND      |
|                 | c-ZR          | 109.14    | 13.91   | 74.15       | 18.77   | 60.00         | 14.70   | 69.54            | 21.36   |
|                 | dhZR          | 2.45      | 1.23    | 3.13        | ND      | 2.14          | 1.40    | 3.99             | 1.30    |
|                 | iP            | 1.13      | 1.10    | 1.35        | 1.00    | ND            | 1.35    | 1.70             | ND      |
|                 | iPR           | 220.17    | 22.62   | 149.02      | 32.71   | 105.67        | 26.38   | 133.81           | 50.74   |
| Auxins          | IAA           | 87.56     | 174.55  | 130.75      | 181.39  | 134.61        | 102.40  | 145.66           | 191.95  |
|                 | IAA-Asp       | 171.57    | 46.59   | 84.02       | 13.33   | 95.34         | 47.98   | 181.67           | 29.20   |
| Gibberellins    | GA1           | ND        | ND      | ND          | ND      | ND            | ND      | 9.65             | ND      |
|                 | GA3           | 3.90      | 4.00    | 8.45        | ND      | ND            | ND      | ND               | ND      |
|                 | GA7           | ND        | ND      | 3.90        | ND      | 7.40          | 5.90    | 3.95             | ND      |
|                 | GA8           | 29.04     | 6.05    | 40.81       | 4.76    | 13.29         | 5.95    | 55.02            | 4.90    |
|                 | GA19          | 66.54     | 131.06  | 83.96       | 129.10  | 94.89         | 45.97   | 94.30            | 108.96  |
|                 | GA29          | 29.10     | 23.64   | 24.96       | 16.15   | 26.20         | 18.37   | 22.18            | 13.67   |
|                 | GA34          | ND        | ND      | ND          | 3.70    | ND            | ND      | ND               | 4.00    |
| GA53            | 3.90          | 8.28      | 4.28    | 9.45        | 7.40    | 5.60          | 4.27    | 6.33             |         |

Table S7. List of significantly affected ABA-related genes fold-changes from well-drained control plants

| Gene name                                         | Gene ID       | Genotypes   |             |             |             |             |
|---------------------------------------------------|---------------|-------------|-------------|-------------|-------------|-------------|
|                                                   |               | Wild-type   | AC-Caribou  | AAC-Trueman | miROE (A8)  | SPL13RNAi-6 |
| PYL9                                              | Medtr3g090980 |             | 1.468333339 | 1.940415079 | 1.313445512 | 1.610158038 |
|                                                   | Medtr8g027805 |             | 1.480644153 |             |             | 1.361084937 |
|                                                   | Medtr1g028380 | 4.963729546 | 16.94250381 | 4.410731563 | 8.915831456 | 10.64340389 |
| PYR1                                              | Medtr5g030500 |             | 0.551276568 |             |             | 0.631988256 |
| ABA-receptor                                      | Medtr7g070050 |             | 0.288305364 |             |             | 0.668773116 |
|                                                   | Medtr1g016480 | 1.726137604 | 2.34850122  | 2.170072974 | 1.451561869 | 2.76464643  |
|                                                   | Medtr5g083270 |             | 0.284645612 | 2.802468962 | 2.302822132 |             |
|                                                   | Medtr4g014460 |             | 0.386710299 | 2.074601331 |             |             |
| ABA induced bHLH                                  | Medtr8g027495 |             | 0.44730769  |             | 0.627963112 | 0.681350829 |
|                                                   | Medtr7g117670 | 0.578658563 | 0.504039594 |             | 0.609460569 | 0.662601162 |
|                                                   | Medtr7g096350 |             |             |             | 1.353689034 |             |
| ABA/WDS Induced protein                           | Medtr1g098680 | 0.509854126 | 0.45983657  | 0.456389774 | 0.558366393 | 0.664104756 |
| XDH1                                              | Medtr2g098030 | 1.708143437 | 1.753770481 | 2.182169255 | 1.587031141 | 1.952980022 |
| zeta-Carotene isomerase                           | Medtr3g084950 |             |             |             |             | 0.621969659 |
|                                                   | Medtr8g097190 |             |             | 2.35743112  |             |             |
| Beta-Carotene Isomerase                           | Medtr7g095920 |             |             |             |             | 0.375806719 |
| ABA-responsive protein                            | Medtr2g035190 | 4.476207756 | 8.025441393 |             |             |             |
| ABA-responsive (TB2/DP1, HVA22) family protein    | Medtr1g024930 | 0.28821008  | 0.200650313 | 0.319513604 | 0.643970772 | 0.208526515 |
| ABA response element-binding factor               | Medtr4g085910 | 2.105747729 | 3.727460438 | 3.134374429 | 1.783055573 | 3.572943355 |
| ABA-responsive-like protein                       | Medtr8g100065 |             |             | 1.788690853 |             | 1.77213165  |
|                                                   | Medtr1g114640 |             |             |             | 2.661306098 |             |
|                                                   | Medtr7g083570 |             |             | 2.125450176 | 1.697723951 |             |
|                                                   | Medtr6g077990 |             | 4.409943923 |             |             |             |
|                                                   | Medtr8g100065 |             | 1.574540283 |             |             |             |
| ABA induced plasma membrane protein               | Medtr4g117600 | 0.450860822 |             |             |             | 0.379373122 |
| PSY                                               | Medtr5g076620 |             |             |             |             | 0.652151143 |
|                                                   | Medtr3g450510 | 0.411986337 | 0.227360821 |             | 0.705058323 | 0.299838299 |
|                                                   | Medtr5g090780 | 0.455543133 | 0.274667972 |             | 0.575679144 | 0.194748945 |
| PDS                                               | Medtr3g084830 |             | 1.482103143 | 1.526032664 |             | 1.377339249 |
| LCY-e                                             | Medtr2g040060 | 0.27241664  | 0.332762581 | 0.574271942 | 0.563130472 | 0.278468961 |
| LCY-b                                             | Medtr7g090150 |             | 0.688293753 |             |             |             |
|                                                   | Medtr8g465870 |             |             | 1.697438637 |             |             |
| CHY                                               | Medtr1g100070 | 0.368081354 | 0.241712735 | 0.608144239 | 0.667732718 | 0.248853736 |
|                                                   | Medtr6g048440 |             | 1.489852257 |             |             |             |
| CCD1                                              | Medtr3g109610 |             | 4.074932125 | 25.13738121 |             | 20.97763582 |
|                                                   | Medtr8g037315 |             |             | 1.915333133 | 1.366102418 |             |
| CCD4                                              | Medtr5g025270 | 0.246985367 | 0.283622967 | 0.172140204 | 0.405135074 | 0.428300805 |
|                                                   | Medtr5g025230 | 0.289981861 | 0.338459135 | 0.184447256 | 0.433233598 | 0.40454507  |
| ZEP                                               | Medtr4g022850 | 4.03297979  | 7.705559819 | 2.67311853  | 2.210951765 | 6.096039107 |
|                                                   | Medtr5g017350 | 3.03308126  | 3.232068708 | 2.438581712 | 2.083075313 | 5.613112534 |
| VDE                                               | Medtr8g092050 |             | 0.618185962 |             |             | 0.62706794  |
|                                                   | Medtr7g116630 | 0.568931294 | 0.561403722 |             | 0.708757417 | 0.532251204 |
| NSY                                               | Medtr7g007280 | 0.459825004 | 0.340076773 | 0.348227281 | 0.651375774 | 0.346068728 |
|                                                   | Medtr6g025680 |             |             |             |             | 3.126790208 |
|                                                   | Medtr6g018550 | 4.045066625 |             |             |             |             |
| NCED3                                             | Medtr2g070460 | 1.852418586 | 6.703907087 | 4.751628254 | 1.628771003 | 6.492220275 |
| Cytochrome P450 family ABA- 8 hydroxylase         | Medtr5g025610 | 0.518542824 |             |             | 0.618119458 | 1.890076358 |
|                                                   | Medtr1g019410 | 3.375806092 | 11.55971202 | 5.120935372 | 2.245986502 | 6.127579653 |
|                                                   | Medtr4g086040 |             | 0.551399468 | 0.584319511 | 0.59505537  | 0.516336322 |
|                                                   | Medtr8g072260 | 0.278184042 | 0.209947451 |             | 1.809095309 | 0.615951388 |
|                                                   | Medtr1g037580 |             |             | 0.49768187  | 1.835384513 |             |
| sucrose nonfermenting 1(SNF1)-related kinase      | Medtr1g034030 | 2.780324005 | 2.711466533 | 2.343780998 | 1.778232373 | 3.525850452 |
|                                                   | Medtr8g079560 |             | 1.916094332 | 1.743409131 |             | 1.705262408 |
|                                                   | Medtr4g099240 |             | 1.790565027 | 1.619925849 | 1.454628246 |             |
|                                                   | Medtr5g018050 |             |             |             | 1.424120656 |             |
| SNF1-related kinase regulatory subunit beta-2     | Medtr5g098510 | 6.884094008 | 9.97537076  | 7.161091135 | 6.328153516 | 10.14232325 |
|                                                   | Medtr2g095290 | 1.921102765 | 2.2018862   | 1.848043183 | 1.541646047 | 1.703699503 |
|                                                   | Medtr2g026695 | 0.600141087 | 0.535881509 | 0.510054311 |             | 0.578046214 |
| SNF1-related kinase catalytic subunit alpha KIN11 | Medtr6g048250 |             | 2.103369823 |             |             | 1.648765123 |
|                                                   | Medtr6g012990 |             | 1.844837154 |             |             | 1.357621649 |
| SNF1-related kinase regulatory subunit gamma 1    | Medtr4g103550 |             | 3.003721173 |             |             | 1.564202386 |
| Snf1-related kinase interactor 1, putative        | Medtr4g007700 |             | 2.444608079 | 1.97123124  |             | 2.363397456 |
| SNF2 family amino-terminal protein                | Medtr4g118720 |             | 1.585782026 |             |             | 1.591472075 |
|                                                   | Medtr7g050445 | 0.27928081  | 0.186708251 |             |             | 0.14658971  |
| SNF2, helicase and zinc finger protein            | Medtr2g012830 | 1.541181957 | 2.142240877 | 1.697455189 | 1.340032077 | 1.643170672 |



Table S8. DEG associated with phenylpropanoid pathway fold change in SPL13RNAi plants

| Control  | Flooded   | Fold change | Gene name | Gene ID         | Gene annotation                                         |
|----------|-----------|-------------|-----------|-----------------|---------------------------------------------------------|
| 0.157259 | 1.79351   | 11.55       | CHS       | Meditr2g01700   | chalcone and stilbene synthase family protein           |
| 0.863899 | 68.4215   | 79.20       | CHS       | Meditr2g083910  | chalcone and stilbene synthase family protein           |
| 1.13824  | 19.3975   | 17.04       | CHS       | Meditr5g007713  | chalcone and stilbene synthase family protein           |
| 0.853317 | 3.76625   | 4.41        | CHS       | Meditr2g097935  | chalcone and stilbene synthase family protein           |
| 2.46825  | 5.57545   | 3.88        | CHS       | Meditr2g083920  | chalcone and stilbene synthase family protein           |
| 0.184781 | 0.580756  | 3.14        | CHS       | Meditr2g097910  | chalcone and stilbene synthase family protein           |
| 0.43232  | 1.1666    | 2.70        | CHS       | Meditr2g098140  | chalcone and stilbene synthase family protein           |
| 281.474  | 496.147   | 1.76        | CHS       | Meditr2g084300  | chalcone and stilbene synthase family protein           |
| 132.399  | 225.551   | 1.70        | CHI       | Meditr2g093980  | chalcone-flavanone isomerase family protein             |
| 24.5176  | 15.9105   | 0.65        | CHI       | Meditr2g075150  | chalcone-flavanone isomerase family protein             |
| 39.1902  | 20.4897   | 0.52        | CHI       | Meditr2g094980  | chalcone-flavanone isomerase family protein             |
| 12.245   | 4.41102   | 0.36        | CHI       | Meditr2g115840  | chalcone-flavanone isomerase family protein             |
| 28.1494  | 2.50074   | 0.09        | CHI       | Meditr2g075950  | chalcone-flavanone isomerase family protein             |
| 8.46837  | 1.74168   | 0.21        | CHI       | Meditr2g022010  | chalcone-flavanone isomerase family protein, putative   |
| 4.43879  | 170.01    | 38.30       | LDGX      | Meditr5g011250  | leucoanthocyanidin dioxygenase-like protein             |
| 26.495   | 17.8889   | 0.68        | LDGX      | Meditr2g015790  | leucoanthocyanidin dioxygenase-like protein             |
| 15.7654  | 5.08904   | 0.32        | LDGX      | Meditr2g070860  | leucoanthocyanidin dioxygenase-like protein             |
| 20.2361  | 2.12126   | 0.16        | LDGX      | Meditr2g086560  | leucoanthocyanidin dioxygenase-like protein             |
| 0.818886 | 29.0492   | 35.47       | F3H       | Meditr2g075830  | naringenin 3-dioxygenase (flavanone-3-hydroxylase)      |
| 10.4318  | 6.88297   | 0.66        | F3H       | Meditr2g058610  | naringenin 3-dioxygenase (flavanone-3-hydroxylase)      |
| 1.39805  | 30.1875   | 21.59       | FLS       | Meditr2g091330  | flavonol synthase/flavanone 3-hydroxylase               |
| 0.353812 | 6.74808   | 19.07       | FLS       | Meditr2g055680  | flavonol synthase/flavanone 3-hydroxylase               |
| 2.22346  | 10.4189   | 4.69        | FLS       | Meditr5g055690  | flavonol synthase/flavanone 3-hydroxylase               |
| 7.03461  | 15.7578   | 2.24        | FLS       | Meditr5g059130  | flavonol synthase/flavanone 3-hydroxylase               |
| 8.76692  | 12.9497   | 1.48        | FLS       | Meditr5g048580  | flavonol synthase/flavanone 3-hydroxylase               |
| 23.4646  | 12.9946   | 0.55        | FLS       | Meditr5g050100  | flavonol synthase/flavanone 3-hydroxylase               |
| 0.132358 | 14.2242   | 107.47      | HID       | Meditr2g450680  | 2-hydroxyisoflavone dehydratase                         |
| 0.474388 | 1.42907   | 3.01        | HID       | Meditr2g051020  | 2-hydroxyisoflavone dehydratase                         |
| 10.8869  | 22.6469   | 2.08        | HID       | Meditr2g104930  | 2-hydroxyisoflavone dehydratase                         |
| 0.674841 | 7.71548   | 11.48       | IFR       | Meditr2g070340  | isoflavanone reductase-like protein                     |
| 0.117758 | 0.857928  | 7.29        | IFR       | Meditr5g020760  | isoflavanone reductase-like protein                     |
| 11.8543  | 71.9415   | 6.07        | DFR       | Meditr2g022440  | dihydroflavonol 4-reductase-like protein                |
| 6.69756  | 3.9136    | 0.58        | DFR       | Meditr2g013250  | dihydroflavonol 4-reductase-like protein                |
| 0.757991 | 41.0798   | 54.22       | F3H       | Meditr2g109470  | flavonoid hydroxylase                                   |
| 0.046738 | 0.740955  | 15.57       | F3H       | Meditr2g045700  | flavonoid hydroxylase                                   |
| 4.49419  | 23.6299   | 5.26        | FGT       | Meditr2g084520  | flavonoid glucosyltransferase                           |
| 6.48035  | 16.63     | 2.57        | FGT       | Meditr2g084530  | flavonoid glucosyltransferase                           |
| 15.9971  | 61.729    | 3.86        | FGT       | Meditr2g128690  | flavonoid glucosyltransferase                           |
| 80.5089  | 102.809   | 0.13        | FGT       | Meditr2g455630  | flavonoid glucosyltransferase                           |
| 72.6701  | 5.51536   | 0.08        | FGT       | Meditr2g031800  | flavonoid glucosyltransferase                           |
| 4.47777  | 0.841314  | 0.19        | FOMT      | Meditr2g083620  | flavonoid O-methyltransferase-like protein              |
| 0.168525 | 0.587252  | 3.48        | AAT       | Meditr2g089560  | anthocyanin 5-aromatic acyltransferase                  |
| 15.963   | 36.3294   | 2.28        | AAT       | Meditr2g089570  | anthocyanin 5-aromatic acyltransferase                  |
| 24.5972  | 53.9455   | 2.19        | AAT       | Meditr2g051180  | anthocyanin 5-aromatic acyltransferase                  |
| 26.359   | 17.3893   | 0.66        | AAT       | Meditr2g104205  | anthocyanin 5-aromatic acyltransferase                  |
| 6.63988  | 2.36659   | 0.36        | AAT       | Meditr2g015860  | anthocyanin 5-aromatic acyltransferase                  |
| 14.1224  | 1.5501    | 0.11        | AAT       | Meditr2g089570  | anthocyanin 5-aromatic acyltransferase                  |
| 84.2219  | 60.3209   | 0.72        | AAT       | Meditr2g018590  | 1-O-acetylglucose-anthocyanin acyltransferase           |
| 0.606445 | 1.25578   | 2.07        | PAL       | Meditr5g098720  | phenylalanine ammonia-lyase-like protein                |
| 17.7626  | 10.6099   | 0.60        | PAL       | Meditr2g101395  | phenylalanine ammonia-lyase-like protein                |
| 21.4047  | 12.6183   | 0.60        | PAL       | Meditr2g101425  | phenylalanine ammonia-lyase-like protein                |
| 0.514246 | 0.833333  | 0.16        | PAL       | Meditr2g464495  | shikimate/quisate hydroxycinnamoyltransferase           |
| 11.9181  | 21.1793   | 1.78        | CCR       | Meditr2g090040  | cinnamoyl-CoA reductase                                 |
| 37.5393  | 75.3853   | 2.01        | CCR       | Meditr2g076200  | cinnamoyl-CoA reductase-like protein                    |
| 522.729  | 888.859   | 1.70        | CCR       | Meditr2g031650  | cinnamoyl-CoA reductase-like protein                    |
| 23.5755  | 11.8414   | 0.50        | CCR       | Meditr2g077100  | cinnamoyl-CoA reductase-like protein                    |
| 14.717   | 6.24377   | 0.42        | CCR       | Meditr2g069940  | cinnamoyl-CoA reductase-like protein                    |
| 71.2782  | 342.814   | 2.00        | CADL      | Meditr2g107425  | cinnamyl alcohol dehydrogenase-like protein             |
| 49.2539  | 72.7787   | 1.57        | CADL      | Meditr2g050170  | cinnamyl alcohol dehydrogenase-like protein             |
| 12.3828  | 18.3453   | 1.48        | CADL      | Meditr5g031180  | cinnamyl alcohol dehydrogenase-like protein             |
| 11.4937  | 4.75367   | 0.41        | CADL      | Meditr2g115300  | cinnamyl alcohol dehydrogenase-like protein             |
| 101.33   | 37.7547   | 0.37        | CADL      | Meditr2g029590  | cinnamyl alcohol dehydrogenase-like protein             |
| 1.01223  | 0.364236  | 0.36        | CADL      | Meditr2g031140  | cinnamyl alcohol dehydrogenase-like protein             |
| 240.397  | 59.0809   | 0.25        | CADL      | Meditr5g031190  | cinnamyl alcohol dehydrogenase-like protein             |
| 3.15267  | 8.28627   | 2.63        | 4CL       | Meditr2g073180  | 4-coumarate:CoA ligase-like protein                     |
| 1.36185  | 9.28901   | 6.82        | 4CL       | Meditr2g057730  | 4-coumarate:CoA ligase-like protein                     |
| 11.3113  | 17.619    | 1.56        | 4CL       | Meditr5g007640  | 4-coumarate:CoA ligase-like protein                     |
| 42.3478  | 57.6463   | 1.36        | 4CL       | Meditr2g128337  | 4-coumarate:CoA ligase-like protein                     |
| 31.8462  | 19.3249   | 0.61        | 4CL       | Meditr2g009730  | 4-coumarate:CoA ligase-like protein                     |
| 110.624  | 66.179    | 0.60        | 4CL       | Meditr2g105710  | 4-coumarate:CoA ligase-like protein                     |
| 0.365712 | 0.0424932 | 0.12        | 4CL       | Meditr2g063110  | 4-coumarate:CoA ligase-like protein                     |
| 13.5551  | 22.704    | 1.67        | MCD       | Meditr2g043310  | malonyl-CoA decarboxylase                               |
| 1.81981  | 27.6218   | 15.18       | MCD       | Meditr2g015830  | malonyl-CoA:isoflavone 7-O-glucoside malonyltransferase |
| 0.118006 | 0.454966  | 3.83        | MCD       | Meditr2g013315  | malonyl-CoA:isoflavone 7-O-glucoside malonyltransferase |
| 0.937934 | 2.29464   | 2.45        | MCD       | Meditr2g013330  | malonyl-CoA:isoflavone 7-O-glucoside malonyltransferase |
| 6.86031  | 2.93338   | 0.43        | MCD       | Meditr2g031380  | malonyl-CoA-acyl carrier transacylase                   |
| 1.70143  | 5.00687   | 2.94        | FNS II    | Meditr2g088160  | cytochrome P450 family flavone synthase                 |
| 0.137557 | 0.919824  | 6.69        | UGT       | Meditr2g059425  | UDP-glucosyltransferase family protein                  |
| 0.350648 | 1.66457   | 4.75        | UGT       | Meditr2g040530  | UDP-glucosyltransferase family protein                  |
| 196.293  | 928.746   | 4.73        | UGT       | Meditr2g179470  | UDP-glucosyltransferase family protein                  |
| 6.33138  | 22.235    | 4.17        | UGT       | Meditr2g105560  | UDP-glucosyltransferase family protein                  |
| 1.2037   | 4.83554   | 4.02        | UGT       | Meditr2g083430  | UDP-glucosyltransferase family protein                  |
| 0.158481 | 0.615249  | 3.88        | UGT       | Meditr2g071050  | UDP-glucosyltransferase family protein                  |
| 2.68234  | 8.55554   | 3.19        | UGT       | Meditr2g064987  | UDP-glucosyltransferase family protein                  |
| 2.94393  | 9.27543   | 3.15        | UGT       | Meditr2g113200  | UDP-glucosyltransferase family protein                  |
| 4.52185  | 13.4526   | 2.98        | UGT       | Meditr2g009490  | UDP-glucosyltransferase family protein                  |
| 13.5481  | 32.2392   | 2.38        | UGT       | Meditr2g046490  | UDP-glucosyltransferase family protein                  |
| 2.79832  | 6.62039   | 2.37        | UGT       | Meditr2g142170  | UDP-glucosyltransferase family protein                  |
| 2.21141  | 4.91576   | 2.22        | UGT       | Meditr2g095040  | UDP-glucosyltransferase family protein                  |
| 0.697333 | 1.46894   | 2.11        | UGT       | Meditr2g0840030 | UDP-glucosyltransferase family protein                  |
| 15.7726  | 32.9981   | 2.09        | UGT       | Meditr2g070040  | UDP-glucosyltransferase family protein                  |
| 31.7106  | 63.4933   | 2.00        | UGT       | Meditr2g009730  | UDP-glucosyltransferase family protein                  |
| 0.521214 | 1.03023   | 1.96        | UGT       | Meditr2g466240  | UDP-glucosyltransferase family protein                  |
| 8.72568  | 17.0294   | 1.95        | UGT       | Meditr2g006710  | UDP-glucosyltransferase family protein                  |
| 140.744  | 263.264   | 1.87        | UGT       | Meditr2g117170  | UDP-glucosyltransferase family protein                  |
| 2.13248  | 3.63389   | 1.70        | UGT       | Meditr2g071070  | UDP-glucosyltransferase family protein                  |
| 4.84927  | 7.40883   | 1.53        | UGT       | Meditr2g116180  | UDP-glucosyltransferase family protein                  |
| 30.7221  | 43.9453   | 1.43        | UGT       | Meditr2g013553  | UDP-glucosyltransferase family protein                  |
| 69.8163  | 46.0608   | 0.66        | UGT       | Meditr5g067170  | UDP-glucosyltransferase family protein                  |
| 7.21762  | 4.68116   | 0.65        | UGT       | Meditr2g072860  | UDP-glucosyltransferase family protein                  |
| 37.1886  | 23.8406   | 0.64        | UGT       | Meditr2g046620  | UDP-glucosyltransferase family protein                  |
| 16.2584  | 9.52955   | 0.59        | UGT       | Meditr5g029800  | UDP-glucosyltransferase family protein                  |
| 6.43999  | 3.7057    | 0.58        | UGT       | Meditr2g090055  | UDP-glucosyltransferase family protein                  |
| 29.8741  | 16.7492   | 0.56        | UGT       | Meditr2g027870  | UDP-glucosyltransferase family protein                  |
| 67.8708  | 36.7269   | 0.54        | UGT       | Meditr2g0780010 | UDP-glucosyltransferase family protein                  |
| 7.9155   | 4.20799   | 0.53        | UGT       | Meditr2g080010  | UDP-glucosyltransferase family protein                  |
| 1.78859  | 0.948812  | 0.53        | UGT       | Meditr2g047030  | UDP-glucosyltransferase family protein                  |
| 6.07381  | 2.92499   | 0.48        | UGT       | Meditr2g102490  | UDP-glucosyltransferase family protein                  |
| 14.6454  | 6.9002    | 0.47        | UGT       | Meditr2g042310  | UDP-glucosyltransferase family protein                  |
| 3.33218  | 1.54762   | 0.47        | UGT       | Meditr2g082490  | UDP-glucosyltransferase family protein                  |
| 2.77768  | 1.23336   | 0.44        | UGT       | Meditr2g024020  | UDP-glucosyltransferase family protein                  |
| 11.0104  | 4.84754   | 0.44        | UGT       | Meditr2g0360010 | UDP-glucosyltransferase family protein                  |
| 9.06752  | 3.95663   | 0.44        | UGT       | Meditr2g014250  | UDP-glucosyltransferase family protein                  |
| 1.13569  | 0.542325  | 0.41        | UGT       | Meditr2g077960  | UDP-glucosyltransferase family protein                  |
| 2.46584  | 0.97921   | 0.40        | UGT       | Meditr2g107325  | UDP-glucosyltransferase family protein                  |
| 18.3859  | 7.18924   | 0.39        | UGT       | Meditr2g035295  | UDP-glucosyltransferase family protein                  |
| 0.946443 | 0.358983  | 0.38        | UGT       | Meditr2g005600  | UDP-glucosyltransferase family protein                  |
| 8.7515   | 3.25115   | 0.37        | UGT       | Meditr2g080870  | UDP-glucosyltransferase family protein                  |
| 7.1097   | 2.47922   | 0.35        | UGT       | Meditr2g068330  | UDP-glucosyltransferase family protein                  |
| 7.86048  | 2.56268   | 0.33        | UGT       | Meditr2g008210  | UDP-glucosyltransferase family protein                  |

|          |           |       |               |                                                           |
|----------|-----------|-------|---------------|-----------------------------------------------------------|
| 3.6433   | 1.16332   | 0.32  | Medr2g083380  | UDP-glucosyltransferase family protein                    |
| 1.48236  | 0.468547  | 0.32  | Medr6g083800  | UDP-glucosyltransferase family protein                    |
| 3.9875   | 1.00155   | 0.29  | Medr6g062600  | UDP-glucosyltransferase family protein                    |
| 3.9818   | 1.13242   | 0.28  | Medr2g012120  | UDP-glucosyltransferase family protein                    |
| 3.986    | 0.829804  | 0.21  | Medr3g069690  | UDP-glucosyltransferase family protein                    |
| 7.38548  | 1.46819   | 0.20  | Medr8g068340  | UDP-glucosyltransferase family protein                    |
| 59.3483  | 11.625    | 0.20  | Medr5g015500  | UDP-glucosyltransferase family protein                    |
| 32.2985  | 6.01307   | 0.19  | Medr3g016560  | UDP-glucosyltransferase family protein                    |
| 37.4396  | 6.72904   | 0.18  | Medr2g034990  | UDP-glucosyltransferase family protein                    |
| 19.8098  | 3.47176   | 0.18  | Medr4g117890  | UDP-glucosyltransferase family protein                    |
| 0.999749 | 0.167898  | 0.17  | Medr0g0810010 | UDP-glucosyltransferase family protein                    |
| 5.80386  | 8.9703    | 0.17  | Medr7g057710  | UDP-glucosyltransferase family protein                    |
| 6.41592  | 0.879345  | 0.14  | Medr6g078320  | UDP-glucosyltransferase family protein                    |
| 10.7019  | 1.42278   | 0.13  | Medr2g008226  | UDP-glucosyltransferase family protein                    |
| 1.52347  | 0.202059  | 0.13  | Medr4g059370  | UDP-glucosyltransferase family protein                    |
| 25.0363  | 2.31422   | 0.13  | Medr4g04140   | UDP-glucosyltransferase family protein                    |
| 98.5232  | 6.06681   | 0.06  | Medr2g008220  | UDP-glucosyltransferase family protein                    |
| 2.63237  | 0.0364904 | 0.01  | Medr5g075440  | UDP-glucosyltransferase family protein                    |
| 12.2024  | 45.3894   | 3.77  | Medr6g033675  | UDP-glucosyltransferase 88A1                              |
| 0.367654 | 0.987389  | 2.69  | Medr3g021725  | UDP-glucosyltransferase 88A1                              |
| 33.3904  | 61.4334   | 1.84  | Medr4g485640  | UDP-glucosyltransferase 73B2                              |
| 115.392  | 191.329   | 1.66  | Medr1g088480  | UDP-glucuronic acid decarboxylase-like protein            |
| 10.4702  | 6.57739   | 0.63  | Medr3g095910  | UDP-glucuronate-xylan alpha-glucuronosyltransferase       |
| 3.85051  | 2.26533   | 0.60  | Medr1g015130  | UDP-glucuronate-xylan alpha-glucuronosyltransferase       |
| 33.2139  | 54.163    | 1.63  | Medr5g090580  | UDP-glucose flavonoid 3-O-glucosyltransferase             |
| 9.65266  | 5.39069   | 0.56  | Medr5g089830  | UDP-glucose flavonoid 3-O-glucosyltransferase             |
| 19.9753  | 31.709    | 1.57  | Medr7g076310  | UDP-galactose transporter 1                               |
| 11.4605  | 16.2493   | 1.42  | Medr3g098640  | UDP-glucose-6-phosphate 4-epimerase                       |
| 16.6317  | 11.0046   | 0.66  | Medr4g46850   | UDP-glucac-adenosine triphosphate glucac-1-P-transferase  |
| 121.813  | 59.2811   | 0.49  | Medr5g043970  | UDP-glucose 6-dehydrogenase family protein                |
| 132.319  | 63.7785   | 0.48  | Medr7g012950  | UDP-glucose 6-dehydrogenase family protein                |
| 71.2601  | 38.6445   | 0.54  | Medr2g096660  | UDP-glucuronic acid decarboxylase                         |
| 0.120398 | 8.52013   | 70.77 | MYB           | Medr5g079670 myb transcription factor                     |
| 0.432767 | 24.86     | 57.44 | MYB           | Medr1g086510 myb transcription factor                     |
| 0.230764 | 4.84289   | 20.99 | MYB           | Medr2g033170 myb transcription factor                     |
| 0.079506 | 1.51186   | 19.02 | MYB           | Medr3g110460 myb transcription factor                     |
| 0.550735 | 6.25846   | 11.36 | MYB           | Medr4g123040 myb transcription factor                     |
| 35.8314  | 237.333   | 6.62  | MYB           | Medr2g096380 myb transcription factor                     |
| 0.530137 | 6.12412   | 5.89  | MYB           | Medr3g083540 myb transcription factor                     |
| 0.124816 | 0.669176  | 6.36  | MYB           | Medr4g074520 myb transcription factor                     |
| 49.1599  | 204.177   | 4.15  | MYB           | Medr5g016510 myb transcription factor                     |
| 0.17398  | 0.682151  | 3.92  | MYB           | Medr5g005460 myb transcription factor                     |
| 14.7859  | 65.1316   | 4.40  | MYB           | Medr4g098982 myb transcription factor                     |
| 0.578214 | 1.48385   | 2.58  | MYB           | Medr3g100720 myb transcription factor                     |
| 1.11895  | 3.08061   | 2.75  | MYB           | Medr2g011660 myb transcription factor                     |
| 84.5599  | 229.053   | 2.71  | MYB           | Medr4g063100 myb transcription factor                     |
| 12.2639  | 27.9997   | 2.28  | MYB           | Medr7g087130 myb transcription factor                     |
| 7.45783  | 14.8842   | 2.00  | MYB           | Medr3g028555 myb transcription factor                     |
| 28.7948  | 54.8752   | 1.91  | MYB           | Medr01233070 myb transcription factor                     |
| 2.53256  | 4.33654   | 1.71  | MYB           | Medr8g095390 myb transcription factor                     |
| 10.7008  | 16.371    | 1.53  | MYB           | Medr3g064500 myb transcription factor                     |
| 16.1631  | 21.335    | 1.44  | MYB           | Medr3g02130 myb transcription factor                      |
| 170.1372 | 127.593   | 0.75  | MYB           | Medr1g067000 myb transcription factor                     |
| 44.9463  | 28.9646   | 0.64  | MYB           | Medr6g477860 myb transcription factor                     |
| 12.8452  | 7.70599   | 0.60  | MYB           | Medr4g102380 myb transcription factor                     |
| 3.35322  | 1.8376    | 0.59  | MYB           | Medr6g013790 myb transcription factor                     |
| 1.30247  | 0.703915  | 0.54  | MYB           | Medr3g028740 myb transcription factor                     |
| 23.5059  | 12.6929   | 0.54  | MYB           | Medr4g073420 myb transcription factor                     |
| 41.6862  | 20.7641   | 0.50  | MYB           | Medr1g063940 myb transcription factor                     |
| 4.51862  | 2.17317   | 0.48  | MYB           | Medr8g098860 myb transcription factor                     |
| 5.79459  | 2.70077   | 0.47  | MYB           | Medr3g049017 myb transcription factor                     |
| 2.0004   | 0.869425  | 0.43  | MYB           | Medr8g468380 myb transcription factor                     |
| 1.60222  | 0.661824  | 0.41  | MYB           | Medr2g097910 myb transcription factor                     |
| 17.9481  | 6.43035   | 0.36  | MYB           | Medr7g061550 myb transcription factor                     |
| 1.89876  | 0.67792   | 0.36  | MYB           | Medr3g087140 myb transcription factor                     |
| 1.14311  | 0.406191  | 0.36  | MYB           | Medr7g096930 myb transcription factor                     |
| 2.11574  | 0.639308  | 0.30  | MYB           | Medr1g085040 myb transcription factor                     |
| 0.640971 | 0.148424  | 0.23  | MYB           | Medr7g117730 myb transcription factor                     |
| 1.96408  | 0.408359  | 0.21  | MYB           | Medr3g085010 myb transcription factor                     |
| 0.699955 | 0.144624  | 0.21  | MYB           | Medr5g082910 myb transcription factor                     |
| 0.844207 | 0.0969873 | 0.11  | MYB           | Medr4g082040 myb transcription factor                     |
| 15.173   | 0.817636  | 0.05  | MYB           | Medr4g214460 myb transcription factor                     |
| 5.80551  | 0.277499  | 0.05  | MYB           | Medr3g061790 myb transcription factor                     |
| 108.368  | 3.02779   | 0.03  | MYB           | Medr2g023100 myb transcription factor                     |
| 4.71002  | 2.80708   | 0.60  | MYB           | Medr1g086180 MYB family transcription factor              |
| 27.6694  | 16.3007   | 0.59  | MYB           | Medr2g02290 MYB family transcription factor               |
| 314.802  | 52.1533   | 0.17  | MYB           | Medr6g077420 MYB family transcription factor              |
| 1.7983   | 0.197476  | 0.11  | MYB           | Medr3g119320 MYB family transcription factor              |
| 12.7126  | 0.980649  | 0.08  | MYB           | Medr3g111880 MYB family transcription factor              |
| 56.0058  | 3.2274    | 0.06  | MYB           | Medr7g089210 MYB family transcription factor              |
| 35.2036  | 0.908802  | 0.03  | MYB           | Medr6g077990 MYB family transcription factor              |
| 10.8536  | 3.60458   | 0.33  | MYB5          | Medr1g026870 transcription repressor MYB5                 |
| 11.7042  | 1.78489   | 0.15  | MYB5          | Medr3g110028 transcription repressor MYB5                 |
| 17.2453  | 26.0005   | 1.51  | MYB51         | Medr5g081860 MYB transcription factor MYB51               |
| 17.6979  | 25.733    | 1.45  | MYB51         | Medr7g067080 MYB transcription factor MYB51               |
| 11.7448  | 16.7709   | 1.43  | MYB51         | Medr3g462790 MYB transcription factor MYB51               |
| 7.93977  | 2.27366   | 0.29  | MYB64         | Medr7g110830 myb transcription factor MYB64               |
| 44.9035  | 203.915   | 4.54  | MYB           | Medr5g037080 MYB-like transcription factor family protein |
| 15.7197  | 59.8905   | 3.81  | MYB           | Medr4g081710 myb-like transcription factor family protein |
| 11.9827  | 29.8953   | 2.70  | MYB           | Medr2g086450 myb-like transcription factor family protein |
| 7.66715  | 17.6767   | 2.31  | MYB           | Medr1g111830 MYB-like transcription factor family protein |
| 23.2199  | 53.217    | 2.29  | MYB           | Medr7g115530 myb-like transcription factor family protein |
| 31.2609  | 67.6386   | 2.16  | MYB           | Medr6g449880 myb-like transcription factor family protein |
| 1.65447  | 5.50801   | 2.12  | MYB           | Medr6g086410 MYB-like transcription factor family protein |
| 10.4112  | 21.8071   | 2.09  | MYB           | Medr6g032990 myb-like transcription factor family protein |
| 0.566713 | 1.15656   | 2.04  | MYB           | Medr1g053835 myb-like transcription factor family protein |
| 0.952566 | 1.92501   | 2.02  | MYB           | Medr7g069660 MYB-like transcription factor family protein |
| 4.61434  | 9.18373   | 1.99  | MYB           | Medr4g111140 myb-like transcription factor family protein |
| 37.7677  | 65.5914   | 1.74  | MYB           | Medr7g088070 myb-like transcription factor family protein |
| 21.7583  | 30.0845   | 1.38  | MYB           | Medr2g027860 myb-like transcription factor family protein |
| 33.209   | 45.1914   | 1.36  | MYB           | Medr7g098250 myb-like transcription factor family protein |
| 13.4695  | 8.48777   | 0.63  | MYB           | Medr6g086835 myb-like transcription factor family protein |
| 25.1176  | 15.6944   | 0.62  | MYB           | Medr4g111975 MYB-like transcription factor family protein |
| 20.6778  | 11.8119   | 0.57  | MYB           | Medr1g090670 myb-like transcription factor family protein |
| 2.04156  | 0.999157  | 0.49  | MYB           | Medr3g093080 myb-like transcription factor family protein |
| 24.6511  | 17.4084   | 0.71  | MYB           | Medr6g077990 Myb transcription factor-like protein        |
| 0.196743 | 2.14551   | 10.41 | Myb/SANT      | Medr7g105890 Myb/SANT-like DNA-binding domain protein     |
| 1.21298  | 8.49433   | 7.00  | Myb/SANT      | Medr4g128540 Myb/SANT-like DNA-binding domain protein     |
| 1.79056  | 11.6691   | 6.52  | Myb/SANT      | Medr06930050 Myb/SANT-like DNA-binding domain protein     |
| 0.084772 | 0.470761  | 5.55  | Myb/SANT      | Medr3g161370 Myb/SANT-like DNA-binding domain protein     |
| 1.64831  | 5.59186   | 1.39  | Myb/SANT      | Medr7g020870 Myb/SANT-like DNA-binding domain protein     |
| 4.24087  | 2.5629    | 0.60  | Myb/SANT      | Medr2g026725 Myb/SANT-like DNA-binding domain protein     |
| 21.9766  | 7.86686   | 0.36  | Myb/SANT      | Medr6g035370 myb/SANT-like DNA-binding domain protein     |
| 1.27208  | 0.355906  | 0.28  | Myb/SANT      | Medr7g061640 Myb/SANT-like DNA-binding domain protein     |
| 6.90884  | 1.26822   | 0.18  | Myb/SANT      | Medr7g114860 Myb/SANT-like DNA-binding domain protein     |
| 0.64763  | 0.094147  | 0.15  | Myb/SANT      | Medr8g085310 Myb/SANT-like DNA-binding domain protein     |
| 1.5387   | 0.156707  | 0.10  | Myb/SANT      | Medr1g094045 Myb/SANT-like DNA-binding domain protein     |
| 0.179537 | 3.0709    | 17.10 | R2R3-myb      | Medr5g078860 R2R3-myb transcription factor                |
| 0.704362 | 11.7703   | 6.71  | R2R3-myb      | Medr3g076910 R2R3-myb transcription factor                |
| 8.07993  | 4.9244    | 0.61  | R2R3-myb      | Medr6g012180 R2R3-myb transcription factor                |
| 1.58705  | 0.736946  | 0.46  | R2R3-myb      | Medr3g039990 R2R3-myb transcription factor                |
| 4.21645  | 1.91166   | 0.45  | R2R3-myb      | Medr01400030 R2R3-myb transcription factor                |

|          |           |       |                |                                                                         |
|----------|-----------|-------|----------------|-------------------------------------------------------------------------|
| 8.00167  | 13.9304   | 1.74  | Medtr3g100180  | myb-like DNA-binding domain protein                                     |
| 0.16105  | 0.659837  | 4.10  | Medtr2g084230  | myb-like DNA-binding domain, shaqhyf class protein                      |
| 0.837505 | 2.54894   | 3.04  | Medtr3g050110  | myb-like DNA-binding domain, shaqhyf class protein                      |
| 3.52187  | 5.91887   | 1.68  | Medtr3g071625  | myb-like DNA-binding domain, shaqhyf class protein                      |
| 1.65367  | 0.882482  | 0.53  | Medtr1g112370  | myb-like DNA-binding domain, shaqhyf class protein                      |
| 0.49824  | 0.159056  | 0.32  | Medtr2g016220  | myb-like DNA-binding domain, shaqhyf class protein                      |
| 4.2808   | 1.24676   | 0.29  | Medtr0g11980   | myb-like DNA-binding domain, shaqhyf class protein                      |
| 3.0424   | 0.617461  | 0.20  | Medtr0230040   | myb-like DNA-binding domain, shaqhyf class protein                      |
| 0.987074 | 2.32545   | 2.36  | Medtr1g100653  | myb transcription factor MKTA-like protein                              |
| 8.20835  | 3.35286   | 0.41  | Medtr7g011170  | myb transcription factor mika-like protein                              |
| 18.249   | 5.89435   | 0.32  | Medtr6g012990  | myb transcription factor MKTA-like protein                              |
| 1.45991  | 0.333044  | 0.23  | Medtr3g013360  | myb transcription factor MKTA-like protein                              |
| 0.11246  | 1.37871   | 12.26 | LBM1           | myb-related transcription factor LBM1                                   |
| 0.158576 | 0.95577   | 62.78 | WD40           | transducin/WD40 repeat protein                                          |
| 48.1375  | 120.24    | 2.50  | WD40           | transducin/WD40 repeat protein                                          |
| 8.21249  | 17.562    | 2.14  | WD40           | transducin/WD40 repeat protein                                          |
| 4.25151  | 7.86745   | 1.85  | WD40           | transducin/WD40 repeat protein                                          |
| 64.3551  | 102.99    | 1.60  | WD40           | transducin/WD40 repeat protein                                          |
| 17.4037  | 24.994    | 1.44  | WD40           | transducin/WD40 repeat protein                                          |
| 16.468   | 23.409    | 1.42  | WD40           | transducin/WD40 repeat protein                                          |
| 19.8835  | 27.1718   | 1.37  | WD40           | transducin/WD40 repeat protein                                          |
| 38.735   | 52.7972   | 1.36  | WD40           | transducin/WD40 repeat protein                                          |
| 32.6727  | 44.437    | 1.36  | WD40           | transducin/WD40 repeat protein                                          |
| 9.49086  | 6.52318   | 0.69  | WD40           | transducin/WD40 repeat protein                                          |
| 7.25918  | 4.88408   | 0.67  | WD40           | transducin/WD40 repeat protein                                          |
| 8.55168  | 5.67702   | 0.66  | WD40           | transducin/WD40 repeat protein                                          |
| 10.9794  | 6.82827   | 0.62  | WD40           | transducin/WD40 repeat protein                                          |
| 4.02492  | 2.42562   | 0.60  | WD40           | transducin/WD40 repeat protein                                          |
| 9.03513  | 5.39885   | 0.60  | WD40           | transducin/WD40 repeat protein                                          |
| 9.52219  | 4.53135   | 0.48  | WD40           | transducin/WD40 repeat protein                                          |
| 1.62882  | 0.448949  | 0.28  | WD40           | transducin/WD40 repeat protein                                          |
| 3.2979   | 0.535583  | 0.17  | WD40           | transducin/WD40 domain protein                                          |
| 12.6325  | 8.58941   | 0.68  | Medtr6g004040  | katatin p80 WD40 repeat subunit B1-like protein                         |
| 13.0724  | 17.4139   | 1.33  | Medtr1g087120  | WD40/YVTN repeat containing domain-containing protein                   |
| 0.482652 | 9.73325   | 20.17 | bHLH           | Medtr1g072320 bHLH transcription factor                                 |
| 9.29101  | 16.4404   | 1.77  | bHLH           | Medtr5g048860 bHLH transcription factor                                 |
| 15.1871  | 26.152    | 1.72  | bHLH           | Medtr4g108360 bHLH transcription factor                                 |
| 27.9724  | 40.992    | 1.47  | bHLH           | Medtr3g131160 bHLH transcription factor                                 |
| 7.58623  | 2.23027   | 0.49  | bHLH           | Medtr3g096605 bHLH transcription factor                                 |
| 13.6047  | 1.83974   | 0.14  | bHLH           | Medtr3g116770 bHLH transcription factor                                 |
| 23.8017  | 90.6247   | 3.81  | bHLH147        | Medtr1g084160 transcription factor bHLH147                              |
| 72.744   | 52.8237   | 0.73  | bHLH137        | Medtr3g098285 transcription factor bHLH137                              |
| 10.6712  | 0.15754   | 0.26  | bHLH93         | Medtr5g003770 transcription factor bHLH93                               |
| 23.9212  | 49.2664   | 2.09  | bHLH           | Medtr7g077470 transcription factor bHLH93-like protein                  |
| 0.481536 | 0.0864422 | 0.18  | bHLH           | Medtr4g079760 transcription factor bHLH107-like protein                 |
| 40.0829  | 83.2713   | 2.08  | bHLH           | Medtr3g088100 bHLH transcription factor-like protein                    |
| 19.4702  | 38.817    | 1.99  | bHLH           | Medtr3g103605 bHLH transcription factor-like protein                    |
| 32.0128  | 61.6959   | 1.93  | bHLH           | Medtr2g101520 bHLH transcription factor-like protein                    |
| 3.1696   | 6.02474   | 1.82  | bHLH           | Medtr7g063470 bHLH transcription factor-like protein                    |
| 12.6943  | 18.2201   | 1.44  | bHLH           | Medtr7g096650 bHLH transcription factor-like protein                    |
| 23.6729  | 32.3027   | 1.36  | bHLH           | Medtr4g051505 bHLH transcription factor-like protein                    |
| 41.6825  | 27.7763   | 0.67  | bHLH           | Medtr4g087300 bHLH transcription factor-like protein                    |
| 2.72595  | 0.94114   | 0.35  | bHLH           | Medtr3g112170 bHLH transcription factor-like protein                    |
| 3.71394  | 6.28639   | 1.69  | bHLH           | Medtr3g052470 transcription factor bHLH122-like protein                 |
| 24.1379  | 39.2204   | 1.61  | bHLH           | Medtr3g050470 transcription factor bHLH122-like protein                 |
| 37.5145  | 65.6528   | 1.75  | bHLH           | Medtr1g070870 basic helix loop helix protein bHLH4                      |
| 3.04939  | 17.4671   | 5.73  | bHLH           | Medtr8g099880 basic helix loop helix protein bHLH8                      |
| 28.1758  | 15.0457   | 0.53  | bHLH           | Medtr7g083900 basic helix loop helix protein bHLH23                     |
| 16.5088  | 23.4003   | 1.42  | bHLH           | Medtr3g043430 bHLH domain class transcription factor                    |
| 22.6827  | 33.1024   | 1.46  | bHLH           | Medtr3g001770 basic helix loop helix (bHLH) family transcription factor |
| 16.5506  | 10.7003   | 0.65  | bHLH           | Medtr8g067280 basic helix loop helix (bHLH) family transcription factor |
| 8.81645  | 4.70374   | 0.53  | bHLH           | Medtr8g024790 basic helix loop helix (bHLH) family transcription factor |
| 0.21782  | 1.11105   | 5.10  | Medtr3g094762  | basic helix loop helix (bHLH) DNA-binding family protein                |
| 33.564   | 16.5108   | 0.49  | Medtr3g014210  | basic helix loop helix (bHLH) DNA-binding family protein                |
| 3.26047  | 1.4972    | 0.46  | Medtr024660020 | basic helix loop helix (bHLH) DNA-binding family protein                |
| 12.2783  | 5.43255   | 0.44  | Medtr5g014600  | basic helix loop helix (bHLH) DNA-binding family protein                |
| 13.8229  | 4.75374   | 0.31  | Medtr3g093750  | basic helix loop helix (bHLH) DNA-binding family protein                |
| 0.748242 | 0.230026  | 0.21  | Medtr3g093750  | basic helix loop helix (bHLH) DNA-binding family protein                |
| 1.96269  | 0.320185  | 0.16  | Medtr2g022280  | basic helix loop helix (bHLH) DNA-binding family protein                |
| 1.14533  | 2.07771   | 1.81  | bZIP           | Medtr4g012430 bZIP protein                                              |
| 10.7869  | 15.1678   | 1.41  | bZIP           | Medtr2g102050 bZIP protein                                              |
| 8.35676  | 1.03161   | 0.12  | bZIP           | Medtr3g019450 bZIP protein                                              |
| 0.075122 | 0.862346  | 11.48 | bZIP           | Medtr2g086340 bZIP transcription factor                                 |
| 0.724958 | 7.2286    | 9.97  | bZIP           | Medtr3g109310 bZIP transcription factor                                 |
| 16.4438  | 64.7385   | 3.94  | bZIP           | Medtr3g080990 bZIP transcription factor                                 |
| 7.33424  | 15.2449   | 0.28  | bZIP           | Medtr3g080990 bZIP transcription factor                                 |
| 7.47561  | 15.3233   | 2.05  | bZIP           | Medtr3g078830 bZIP transcription factor                                 |
| 11.0567  | 22.0465   | 1.99  | bZIP           | Medtr6g034945 bZIP transcription factor                                 |
| 47.7718  | 83.2262   | 1.74  | bZIP           | Medtr5g038550 bZIP transcription factor                                 |
| 18.1531  | 30.1794   | 1.66  | bZIP           | Medtr3g023690 bZIP transcription factor                                 |
| 18.0279  | 28.3531   | 1.52  | bZIP           | Medtr3g090950 bZIP transcription factor                                 |
| 14.4279  | 21.0393   | 1.46  | bZIP           | Medtr3g436010 bZIP transcription factor                                 |
| 3.15742  | 2.04794   | 0.65  | bZIP           | Medtr8g091250 bZIP transcription factor                                 |
| 16.3044  | 30.2419   | 0.63  | bZIP           | Medtr4g072090 bZIP transcription factor                                 |
| 18.4919  | 9.12766   | 0.50  | bZIP           | Medtr3g094020 bZIP transcription factor                                 |
| 18.584   | 6.23088   | 0.34  | bZIP           | Medtr5g075390 bZIP transcription factor                                 |
| 5.32053  | 1.69353   | 0.32  | bZIP           | Medtr5g087740 bZIP transcription factor                                 |
| 14.6869  | 4.54229   | 0.31  | bZIP           | Medtr2g047120 bZIP transcription factor                                 |
| 1.18751  | 0.35049   | 0.20  | bZIP           | Medtr3g014210 bZIP transcription factor                                 |
| 2.10162  | 0.368046  | 0.18  | bZIP           | Medtr6g016375 bZIP transcription factor                                 |
| 13.3568  | 22.6691   | 1.70  | bZIP           | Medtr8g091650 bZIP family transcription factor                          |
| 39.776   | 61.8403   | 1.57  | bZIP           | Medtr8g040120 bZIP family transcription factor                          |
| 0.171538 | 0.62132   | 0.61  | bZIP           | Medtr3g092750 bZIP family transcription factor                          |
| 7.1997   | 24.1693   | 3.36  | bZIP           | Medtr5g060950 bZIP family transcription factor                          |
| 0.06184  | 0.346624  | 5.61  | bZIP           | Medtr01260080 bZIP family transcription factor                          |
| 0.267177 | 1.28501   | 4.81  | bZIP           | Medtr2g086420 bZIP family transcription factor                          |
| 20.1294  | 1.62464   | 0.08  | bZIP           | Medtr3g079500 bZIP family transcription factor                          |
| 8.44693  | 0.614546  | 0.07  | bZIP           | Medtr2g090900 bZIP family transcription factor                          |
| 67.0252  | 375.604   | 5.60  | bZIP124        | Medtr4g070860 bZIP transcription factor bZIP124                         |
| 30.9631  | 116.475   | 3.76  | bZIP124        | Medtr3g117120 bZIP transcription factor bZIP124                         |
| 26.9435  | 17.6029   | 0.68  | bZIP90         | Medtr7g081705 bZIP transcription factor bZIP90                          |
| 14.249   | 2.38044   | 0.17  | bZIP98         | Medtr7g115120 transcription factor bZIP98                               |
| 3.84622  | 11.8769   | 3.09  | bZIP           | Medtr8g028150 bZIP transcription factor family protein                  |
| 41.7014  | 84.3009   | 2.02  | bZIP           | Medtr7g116890 bZIP transcription factor family protein                  |
| 33.7726  | 24.8979   | 0.74  | bZIP           | Medtr3g077950 bZIP transcription factor family protein                  |
| 0.463323 | 4.68381   | 10.11 | GST            | Medtr3g080440 glutathione S-transferase                                 |
| 0.973524 | 13.4098   | 13.77 | GST            | Medtr1g115195 glutathione S-transferase                                 |
| 50.4936  | 100.29    | 1.99  | GST            | Medtr1g067170 glutathione S-transferase                                 |
| 26.1468  | 48.6235   | 1.86  | GST            | Medtr3g090910 glutathione S-transferase                                 |
| 1.68396  | 9.01346   | 1.85  | GST            | Medtr7g100320 glutathione S-transferase                                 |
| 40.9017  | 57.9545   | 1.42  | GST            | Medtr3g450790 glutathione S-transferase                                 |
| 369.912  | 105.272   | 0.28  | GST            | Medtr1g115500 glutathione S-transferase                                 |
| 25.7497  | 14.2299   | 0.55  | Medtr2g072120  | glutathione S-transferase tau                                           |
| 15.8005  | 53.8127   | 0.41  | GSTUS          | Medtr4g134380 glutathione S-transferase tau 5                           |
| 13.6054  | 30.2248   | 2.22  | Medtr4g134370  | glutathione S-transferase tau 5                                         |
| 0.989109 | 12.1507   | 12.28 | Medtr1g090150  | glutathione S-transferase, amino-terminal domain protein                |
| 8.03876  | 458.188   | 57.00 | Medtr3g064700  | glutathione S-transferase, amino-terminal domain protein                |
| 0.903146 | 21.6331   | 23.95 | Medtr3g090600  | glutathione S-transferase, amino-terminal domain protein                |
| 3.50749  | 31.068    | 8.86  | Medtr7g050265  | glutathione S-transferase, amino-terminal domain protein                |
| 3.79018  | 24.5397   | 6.47  | Medtr7g065230  | glutathione S-transferase, amino-terminal domain protein                |
| 7.72919  | 44.3179   | 5.80  | Medtr2g067070  | glutathione S-transferase, amino-terminal domain protein                |
| 6.26214  | 28.0683   | 4.48  | Medtr3g099757  | glutathione S-transferase, amino-terminal domain protein                |
| 0.207468 | 0.775324  | 3.73  | Medtr2g070120  | glutathione S-transferase, amino-terminal domain protein                |
| 0.419894 | 1.09915   | 2.62  | Medtr3g467420  | glutathione S-transferase, amino-terminal domain protein                |
| 3.59599  | 8.75863   | 2.44  | Medtr3g061950  | glutathione S-transferase, amino-terminal domain protein                |
| 13.2277  | 25.8655   | 1.91  | Medtr3g088635  | glutathione S-transferase, amino-terminal domain protein                |
| 4.09234  | 6.59916   | 1.61  | Medtr4g019780  | glutathione S-transferase, amino-terminal domain protein                |
| 23.5805  | 37.5887   | 1.59  | Medtr3g059970  | glutathione S-transferase, amino-terminal domain protein                |
| 80.0303  | 42.5945   | 0.53  | Medtr3g060600  | glutathione S-transferase, amino-terminal domain protein                |
| 1.80519  | 0.947428  | 0.47  | Medtr3g057020  | glutathione S-transferase, amino-terminal domain protein                |
| 22.2606  | 10.5267   | 0.47  | Medtr2g070060  | glutathione S-transferase, amino-terminal domain protein                |
| 3.49344  | 1.50116   | 0.43  | Medtr8g098430  | glutathione S-transferase, amino-terminal domain protein                |
| 19.2616  | 7.21202   | 0.37  | Medtr1g026140  | glutathione S-transferase, amino-terminal domain protein                |
| 9.42449  | 3.23428   | 0.34  | Medtr2g070210  | glutathione S-transferase, amino-terminal domain protein                |
| 64.2695  | 15.2161   | 0.24  | Medtr3g037390  | glutathione S-transferase, amino-terminal domain protein                |

**Table S9. Coding sequences of SPLs with conserved squamosa binding domain from different plants used for phylogenetic analysis**

>AtSPL1  
tgtcaggtcgaaaactgtgaagctgatcttagttaaagttaaaggattatcatagacgccataaagttctgtgagatgcaatccaaggctactagtccactgtcggaggtatcttgcagcgttttgcagcaatgtagtaggttccatctctcaggagtttgatgaaggaagagaagt  
tgcctgtagactttggctggccataataaacctcggaggaagaaacaaat  
>AtSPL2  
tgtcaagttgaaagctgtaactcttgcattctcatcagctaaagactatccgaaacataaggtttgtgaaatcattcaaaagttctcaaaagctgtgtgagtgccgtgagagctcgtcttcccaacaatgtacagagttccatctctctcaggtttgatgagaagaactgac  
tgtcgcagcgtctctcagatcaacaatgcaagcgtcgcgaagcaaat  
>AtSPL3  
tgtcaggtcgaaagttgtaccgcatatgagcaaaagccaaacagaccacaacacacaagctgccagttccatgcaaaagctcctcatgtccgactctctggcttccaccaagctttctgcaacaatgtacagagttccatcgcgctcagtgagttgatgaagcaaacggagt  
tgcaggagacgcttagctggacacaatgagagagaggggaaagcaaa  
>AtSPL4  
tgcacaagtagatgacagctgatagaagagcaaaactgtatcacggagacacaagttgtgaaatcatgcaaaagcattctctctctctcaggaattaaccaagcttttgcacaatgtacagagttccatgacccaagattgatgaagctaaagagaat  
tgcaggagcgtcttagctggacacaatgagcaagaaagaaagagagctct  
>AtSPL5  
tgcaggtcgataggtgacactgttaattgactgagccaaagcagttatcccgagacacagagatgtgaaatgacatgcaaaagcattctgctgactgtgcaagggctcagcaagcgttttgcacaatgtacagagttccatgacccaagattgatgaagctaaagaaagc  
tgcaggagcgtcttagctggacacaatgagagagagaaagagatctct  
>AtSPL6  
tgtcaagttatgggtgtagtagactctgagctcttgcagaagattaccacaagagcctagagtttgcagagctcattcgaagcctctgtgctcatagttaatggcttgaacagaggttttgcacaatgtacagagttccatctctcagagtttgatgatgcaaaagaaat  
tgcagagagcgttagcgcgtcacaatgacgaagaaagaaagaaactgca  
>AtSPL7  
tgtcaggttccggattgaaagcgtatattagcagctcaaaagctaccataagagcctaaaggtttgtcctcgtctgctaccgacagcttctgttctgtgagtgagagataaagactctgcaacagtgtagaagttccatctctcagagtttgatgaagaaagcagc  
tgtcggagaaagcttagagcgtcacaacaacagcagaaagaaagaaact  
>AtSPL8  
tgcacaagcagagaggtgcaacgagactgacccagcgcgaacactaccacagaagcacaaggttgcgaaatccactcaaaagcctcagcgttctgagcgcggactaagcaaaaggtttgcagcaatgtacagagttccatctctcagagtttgacacgggaaagcagc  
tgcctgaaagcgtctgctgacccaatccgcccgcctgtaaatgtcac  
>AtSPL9  
tgcacaagtgaaagttgtggatggtatcaaccaatgcaaaagttattactcgagacacagagtttggagtgcaactcaaaacacctaagctcactgtggctggtatgcaacagaggttttgcacaatgtacagagttccatcagctccgaaattgacatgaaagaaagc  
tgcgcagagagcctctgctgacataatgagcagcagagaaagccag  
>AtSPL10  
tgcacaatgtaggctgtgagctgactctctctctcaagattatccatgcaagcagatagctgcgaaagcattcaaaagctcctgtgagtgccctgaaagcgttctgcacaatgtacagagttccatgctctcagaattgatgaaagaaagcagc  
tgcgcaaacgctcttctctcacaatgcaagcgtcgcgaagccaaa  
>AtSPL11  
tgcacaatgtaggctgtgactgactctctctctcaaggtttatcctgtaagcacaagctctgcgaaagcattcaaaagctcctcaaaagcttagcgtgagtgccctgaaagcgttctgcacaatgtacagagttccatgctctcagaattgatgagaagaaagc  
tgcgcaaacgctcttctctcacaatgcaagcgtcgcgaagccaaa  
>AtSPL12  
tgtcaggtgacaactgtgagctgtatgaaagaaagttaaagattatcatagacgtcacaagtttgcgaaagcattcaaaagctactactgcaactgttggagaaatgtagcaggttttgcacaatgtagtaggttccatgctctcagaattgatgaggaagagaagt  
tgcctgtagactttggctggcacaataaagcctagagagaaagcaaat  
>AtSPL13  
tgtctgtgtgagtaggtctgattctgatttgaatgtgagagagtaataaagagacataaagtttgcgagttcattcaaaactcctgtggttactatgaatgtcacaacagaggttttgcacaatgtacagagttccatgcttggagagttgatgaggaagagaagt  
tgtcggaaacgcttggtagacaataatgcaagcgcggaagccag  
>AtSPL14  
tgtcaggttgataattgtaactgaagattgtctcctgtaagattatcatagaagcacaagtttgcgaaatccatgaaagctcctgctggtgtaaacagatgagaggtttgcacaatgtacagagttccatctgctctcagattgatgagggaaagagaagt  
tgtaggcgtgattggctggccataatgcaagcggagagaaactacg  
>AtSPL15  
tgcacaagtgaaagttgtagaattgatacaatgttaagcttattactcgagacacaagtttgtgattcactcctaagctcattcaagcttctctggtctcacaaggttttgcacaatgtacagagttccatcgcctctcagattgatgaggaagagaagt  
tgcgcaagagactcgccttgcacaacgagcagagaaagaaaccaaa  
>AtSPL16  
tgtcaggttgataattgtaagaaagatttcaattgctaagattatcatagaagcacaagtttgcgaggtcctagcaagactcactaaagctcttgcgaaacagatgagaggttttgcacaatgtacagagttccatcgcctctcagattgatgaggaagagaagt  
ttaggcgtgattgtaggtcacaacagcggagagaaagaaaccag  
>GmSPL1a  
tgtcaagttgatggtttagcgtctgataagtgaaagcctaacactagcgtcacaagtttgcgagttaccatgcaagcctcctcctgactcattggagaccagcacaacaggttttgcacaatgtagtaggttccatgagctatcagaattcgactcaaaagagc  
tgcagaaagcgtttggctggacataatgagagcgtcgcgaagaaatgca  
>GmSPL1b  
tgcacaagtgacaattgtgactgactgagtgaaagcctaacagacccaagagcacaagtttgcgagttaccatgcaagcctcctcctgacacatggcagggctgcaacaaggttttgcacaatgtacagagttccatgctatcagaattgatgactcaaaagagc  
ttagaacgcggttggctggcacaatgagagcgtcgcgaagaaatgca  
>GmSPL2  
tgtcagcagagatattgtgctgatttgcactgtgcaaaaggtaccatgcgctcacaagtttgcgagttcattcaaaagcctcctctctgtaggttgcagactgagcagaggtttgcagcaatgtacagagttccatgctgagagttgatgaagctaaagaaagc  
tgcggagagcgttggcagacacaacgagcgcgcaagaaagcaac  
>GmSPL6  
tgtcaagttatggttgaacatgattgactcctcaaaagattaccacaagagcacaagtttgcgagttcactcaaaagcctcaaaagattgttaaatgaaatgaaacagaggttttgcagcagtgacagagttccatctctcagctgagttcgatggttaagcagc  
tgcagagcgtcttagcaggaacacaatgaaagcagagaaagccaaa  
>GmSPL8  
tgcagggccagaggttgcaatgctgactctgcgaaagcactatcacggccacaaggttgcgagtttccatcaaaagcgcgaccctgacgcgcgctgactcagcagcttgcagcaatgtacagagttccatctctctcagattgatgaaagaaagcagc  
tgcagaaagagattgtagcagatcacaatgcccagagaaagaaactcaa  
>GmSPL9  
tgtcaggttgagggctgcaagtagatctgagttgctgaaagcttactattctagcacaagtttgcacatgcaactcaaaagctcctcactctgattgtgctggtttggagcaaggttttgcacaatgtacagagttccatcgcctctcagaattgatgaaagaaagc  
tgcgcagggcacttgcgtcacaatgagcgcgcaagaaagccccc  
>GmSPL9b





Table S10. DEG associated with glycolysis and TCA fold change in SPL13RNAi plants

| Control  | Flooded  | Gene name | Gene ID        | Gene annotation                                            |
|----------|----------|-----------|----------------|------------------------------------------------------------|
| 0.292283 | 4.07574  | ACS       | Medtr7g079080  | 1-aminocyclopropane-1-carboxylate synthase                 |
| 1.23672  | 2.54512  | ACS       | Medtr8g028600  | 1-aminocyclopropane-1-carboxylate synthase                 |
| 33.2025  | 22.6475  | ACS       | Medtr8g098930  | 1-aminocyclopropane-1-carboxylate synthase                 |
| 0.407777 | 0.046786 | ACS       | Medtr4g097540  | 1-aminocyclopropane-1-carboxylate synthase                 |
| 52.2622  | 336.989  | ACO       | Medtr5g085330  | 1-aminocyclopropane-1-carboxylate oxidase                  |
| 46.8868  | 165.751  | ACO       | Medtr3g083370  | 1-aminocyclopropane-1-carboxylate oxidase                  |
| 14.4589  | 42.9741  | ACO       | Medtr2g025120  | 1-aminocyclopropane-1-carboxylate oxidase                  |
| 7.47745  | 19.7655  | ACO       | Medtr3g088565  | 1-aminocyclopropane-1-carboxylate oxidase                  |
| 1.17664  | 0.189009 | ACO       | Medtr1g043760  | 1-aminocyclopropane-1-carboxylate oxidase                  |
| 5.80576  | 0.381962 | ACO       | Medtr8g024120  | 1-aminocyclopropane-1-carboxylate oxidase                  |
| 6.46515  | 0.357816 | ACO       | Medtr1g070120  | aminocyclopropanecarboxylate oxidase                       |
| 0.05795  | 7.51682  | ACO-L     | Medtr8g028435  | 1-aminocyclopropane-1-carboxylate oxidase-like protein     |
| 1.59279  | 48.2452  | ACO-L     | Medtr1g032220  | 1-aminocyclopropane-1-carboxylate oxidase-like protein     |
| 1.16709  | 23.3807  | ACO-L     | Medtr1g032250  | 1-aminocyclopropane-1-carboxylate oxidase-like protein     |
| 0.05876  | 0.44284  | ACO-L     | Medtr1g032140  | 1-aminocyclopropane-1-carboxylate oxidase-like protein     |
| 4.21246  | 8.38377  | ACO-L     | Medtr4g099390  | 1-aminocyclopropane-1-carboxylate oxidase-like protein     |
| 46.4123  | 15.3528  | ACO-L     | Medtr4g117880  | 1-aminocyclopropane-1-carboxylate oxidase-like protein     |
| 60.8768  | 43.9499  | GPI       | Medtr5g065880  | glucose-6-phosphate isomerase                              |
| 46.6782  | 29.2285  | GPI       | Medtr6g009330  | glucose-6-phosphate isomerase                              |
| 21.9428  | 78.6897  | GPI-L     | Medtr7g116910  | glucose-6-phosphate 1-epimerase-like protein               |
| 4.77392  | 0.722638 | GPI-L     | Medtr4g092780  | glucose-6-phosphate 1-epimerase-like protein               |
| 62.6073  | 41.0816  | G6PDH     | Medtr1034s0010 | glucose-6-phosphate 1-dehydrogenase                        |
| 24.1502  | 14.5054  | G6PDH     | Medtr0590s0010 | glucose-6-phosphate 1-dehydrogenase                        |
| 21.5236  | 11.1966  | G6PDH     | Medtr7g111760  | glucose-6-phosphate 1-dehydrogenase                        |
| 20.9832  | 11.2963  | G6PDH     | Medtr0275s0010 | glucose-6-phosphate 1-dehydrogenase                        |
| 7.75127  | 378.812  | GlgC      | Medtr4g070430  | glucose-1-phosphate adenyltransferase family protein       |
| 15.2253  | 99.1674  | GlgC      | Medtr3g116860  | glucose-1-phosphate adenyltransferase family protein       |
| 118.531  | 208.528  | GlgC      | Medtr5g097010  | glucose-1-phosphate adenyltransferase family protein       |
| 64.9239  | 48.9034  | GlgC      | Medtr3g082150  | glucose-1-phosphate adenyltransferase family protein       |
| 145.958  | 34.3167  | GlgC      | Medtr4g131760  | glucose-1-phosphate adenyltransferase family protein       |
| 0.806535 | 0.182397 | GlgC      | Medtr7g111020  | glucose-1-phosphate adenyltransferase family protein       |
| 9.28271  | 560.857  | APE2      | Medtr2g022700  | glucose-6-phosphate/phosphate translocator-like protein    |
| 433.367  | 174.379  | FBPase    | Medtr7g066120  | fructose-1,6-bisphosphatase                                |
| 25.979   | 13.2709  | FBPase    | Medtr4g093620  | fructose-1,6-bisphosphatase                                |
| 250.3    | 72.776   | FBPase    | Medtr6g035305  | fructose-1,6-bisphosphatase, cytosolic-like protein        |
| 0.501292 | 0.087603 | FBPase    | Medtr2g008030  | fructose-1,6-bisphosphatase, cytosolic-like protein        |
| 28.2472  | 47.7547  | FBA       | Medtr1g061050  | fructose-bisphosphate aldolase                             |
| 193.732  | 129.19   | FBA       | Medtr5g069050  | fructose-bisphosphate aldolase                             |
| 108.064  | 8.29535  | FBA       | Medtr5g096670  | fructose-bisphosphate aldolase                             |
| 255.707  | 147.846  | cFBA      | Medtr4g057670  | fructose-bisphosphate aldolase class I                     |
| 2805.73  | 1255.73  | cFBA      | Medtr4g071860  | fructose-bisphosphate aldolase class I                     |
| 39.8398  | 55.0008  | pFBA      | Medtr6g069660  | fructose-bisphosphate aldolase class-II protein            |
| 49.3714  | 22.8812  | FKFBP     | Medtr3g464770  | fructose-6-phosphate-2-kinase/fructose-2, 6-bisphosphatase |
| 4.64322  | 2.48202  | FKFBP     | Medtr8g066450  | fructose-6-phosphate-2-kinase/fructose-2, 6-bisphosphatase |
| 43.0044  | 18.6331  | FKFBP     | Medtr5g071900  | fructose-6-phosphate-2-kinase/fructose-2, 6-bisphosphatase |
| 32.9084  | 64.1851  | PPF       | Medtr4g132700  | pyrophosphate-fructose-6-phosphate 1-phosphotransferase    |
| 86.4387  | 43.6765  | PPF       | Medtr1g035230  | pyrophosphate-fructose-6-phosphate 1-phosphotransferase    |
| 75.3817  | 32.4042  | PPF       | Medtr2g025020  | pyrophosphate-fructose-6-phosphate 1-phosphotransferase    |
| 11.5014  | 7.90297  | GFAT      | Medtr7g080270  | glucosamine-fructose-6-phosphate aminotransferase          |
| 1.50605  | 19.7827  | LKR/SDH   | Medtr4g124470  | lysine-ketoglutarate reductase/saccharopine dehydrogenase  |
| 21.416   | 60.8072  | DUF707-L  | Medtr2g012570  | lysine ketoglutarate reductase trans-splicing-like protein |
| 0.188594 | 0.683537 | DUF707-L  | Medtr4g058800  | lysine ketoglutarate reductase trans-splicing-like protein |
| 4.72316  | 9.38377  | DUF707-L  | Medtr2g005330  | lysine ketoglutarate reductase trans-splicing-like protein |
| 3.76927  | 8.40902  | DUF707    | Medtr8g089820  | lysine ketoglutarate reductase trans-splicing protein      |
| 22.9177  | 40.6687  | DUF707    | Medtr3g086610  | lysine ketoglutarate reductase trans-splicing protein      |
| 0.036409 | 0.391954 | GLR       | Medtr2g015310  | glutamate receptor 27                                      |
| 1.61681  | 2.70688  | GLR       | Medtr3g105595  | glutamate receptor 32                                      |
| 16.0473  | 25.5125  | GLR       | Medtr2g088450  | glutamate receptor 32                                      |
| 28.4751  | 43.982   | GLR       | Medtr5g024350  | glutamate receptor 32                                      |
| 1.72447  | 0.8265   | FPGS      | Medtr1g028510  | tetrahydrofolylpolyglutamate synthase                      |
| 30.2332  | 21.5555  | GLT       | Medtr1g027020  | NADH glutamate synthase                                    |
| 375.259  | 225.587  | GLSF      | Medtr7g089970  | ferredoxin-dependent glutamate synthase                    |
| 10.0575  | 33.0235  | GAD       | Medtr3g064740  | glutamate decarboxylase                                    |
| 10.6646  | 1.87683  | GDH       | Medtr6g029460  | NADP-specific glutamate dehydrogenase                      |
| 40.4652  | 11.2278  | GDH       | Medtr7g085630  | NADP-specific glutamate dehydrogenase                      |
| 1.18988  | 4.42316  | NodGS     | Medtr1g062710  | nodulin/glutamate-ammonia ligase-like protein              |
| 1354.52  | 613.394  | GGAT      | Medtr5g033230  | glutamate-glyoxylate aminotransferase                      |
| 303.199  | 87.6004  | GASA1     | Medtr3g118070  | glutamate-1-semialdehyde 2,1-aminomutase                   |
| 13.6836  | 40.2263  | GABARAP   | Medtr2g023430  | gaba-receptor-associated protein ubiquitin domain protein  |
| 59.1437  | 92.2045  | GABARAP   | Medtr2g088230  | gaba-receptor-associated protein ubiquitin domain protein  |
| 78.0739  | 116.506  | GABARAP   | Medtr4g101090  | gaba-receptor-associated protein ubiquitin domain protein  |
| 64.168   | 88.8288  | GABARAP   | Medtr4g048510  | gaba-receptor-associated protein ubiquitin domain protein  |
| 30.1675  | 158.107  | TPS       | Medtr1g109620  | trehalose-6-phosphate synthase domain protein              |
| 29.0621  | 129.856  | TPS       | Medtr1g032730  | trehalose-6-phosphate synthase domain protein              |
| 20.2449  | 49.7794  | TPS       | Medtr0034s0170 | trehalose-6-phosphate synthase                             |
| 13.8054  | 21.4043  | TPS       | Medtr2g073260  | trehalose-6-phosphate synthase                             |
| 22.4012  | 16.7394  | TPS       | Medtr4g080160  | trehalose-6-phosphate synthase domain protein              |
| 4.28908  | 2.14877  | TPS       | Medtr4g129270  | trehalose-6-phosphate synthase domain protein              |
| 8.04799  | 3.02819  | TPS       | Medtr8g105740  | trehalose-6-phosphate synthase domain protein              |
| 50.7712  | 20.4159  | TPP       | Medtr4g036090  | trehalose-phosphate phosphatase                            |
| 2.23129  | 4.37979  | TPP       | Medtr4g101600  | trehalose-phosphate phosphatase                            |
| 9.57638  | 5.49931  | HK        | Medtr8g014530  | hexokinase                                                 |
| 10.9137  | 5.73095  | HK        | Medtr6g088795  | hexokinase                                                 |
| 3.38202  | 13.023   | PFK       | Medtr2g100710  | 6-phosphofructokinase                                      |
| 0.525803 | 1.31515  | PFK       | Medtr5g032570  | 6-phosphofructokinase                                      |
| 11.2548  | 26.9884  | PFK       | Medtr4g134290  | 6-phosphofructokinase                                      |
| 24.4676  | 54.5847  | PFK       | Medtr8g102190  | 6-phosphofructokinase                                      |
| 23.1086  | 47.2095  | PFK       | Medtr6g090130  | 6-phosphofructokinase                                      |

|          |          |            |                |                                                             |
|----------|----------|------------|----------------|-------------------------------------------------------------|
| 11.2702  | 50.4042  | PGM        | Medtr8g006290  | phosphoglycerate mutase family protein                      |
| 18.34    | 13.0719  | PGM        | Medtr4g092840  | phosphoglycerate mutase family protein                      |
| 75.32    | 38.3234  | PGM        | Medtr2g013570  | phosphoglycerate mutase                                     |
| 44.0105  | 22.3197  | PGM        | Medtr3g111310  | phosphoglycerate mutase family protein                      |
| 1.90495  | 0.857637 | PGK        | Medtr6g018680  | phosphoglycerate kinase                                     |
| 7.66652  | 3.45295  | PGK        | Medtr2g095260  | 2-phosphoglycerate kinase                                   |
| 0.469678 | 1.00654  | PGK        | Medtr1g056720  | 2-phosphoglycerate kinase                                   |
| 1536.74  | 327.218  | PGK        | Medtr2g066610  | phosphoglycerate kinase-like protein                        |
| 1.86224  | 0.826396 | PGK        | Medtr6g011290  | phosphoglycerate mutase-like protein                        |
| 13.4134  | 7.83134  | PGK        | Medtr7g009060  | phosphoglycerate mutase-like protein                        |
| 682.462  | 299.553  | GLP        | Medtr7g080530  | phosphoglycolate phosphatase-like protein                   |
| 56.0631  | 30.1008  | PGDH       | Medtr1g107480  | D-3-phosphoglycerate dehydrogenase family protein           |
| 17.7314  | 52.2952  | ALMT       | Medtr5g014310  | aluminum activated malate transporter family protein        |
| 2.89802  | 7.83636  | ALMT       | Medtr4g051575  | aluminum activated malate transporter family protein        |
| 3.08243  | 7.52092  | ALMT       | Medtr4g098570  | aluminum activated malate transporter family protein        |
| 119.282  | 44.3424  | OMT        | Medtr2g009220  | 2-oxoglutarate/malate translocator                          |
| 164.826  | 35.2882  | OMT        | Medtr4g065007  | 2-oxoglutarate/malate translocator                          |
| 45.4885  | 24.525   | IPMS       | Medtr1g116500  | 2-isopropylmalate synthase                                  |
| 51.0659  | 19.3914  | IPMDH      | Medtr2g104610  | 3-isopropylmalate dehydrogenase                             |
| 464.035  | 112.462  | gMDH       | Medtr4g092690  | glyoxysomal malate dehydrogenase                            |
| 286.01   | 171.914  | MDH        | Medtr8g463760  | malate dehydrogenase                                        |
| 190.785  | 108.574  | MDH        | Medtr1g076130  | cytoplasmic-like malate dehydrogenase                       |
| 265.539  | 150.151  | MDH        | Medtr1g043040  | cytoplasmic-like malate dehydrogenase                       |
| 11.191   | 4.49178  | MDH        | Medtr8g005980  | cytoplasmic-like malate dehydrogenase                       |
| 189.87   | 92.4863  | ACLY       | Medtr2g034090  | ATP:citrate lyase                                           |
| 187.941  | 55.8366  | ACLA-1     | Medtr2g062920  | ATP-citrate synthase alpha chain protein                    |
| 30.176   | 48.9079  | CSY3       | Medtr3g048920  | citrate synthase 3, peroxisomal protein                     |
| 92.3021  | 123.627  | IDH        | Medtr5g077070  | NADP-dependent isocitrate dehydrogenase                     |
| 28.3778  | 9.77807  | ASS        | Medtr4g103680  | argininosuccinate synthase                                  |
| 50.8709  | 23.5838  | ADSL       | Medtr7g092860  | adenylosuccinate lyase                                      |
| 5.10698  | 2.51499  | ADSL       | Medtr5g081750  | adenylosuccinate lyase                                      |
| 81.2238  | 48.7435  | GLYR       | Medtr8g028120  | glyoxylate/succinic semialdehyde reductase                  |
| 50.2928  | 13.4202  | GLYR       | Medtr2g099910  | glyoxylate/succinic semialdehyde reductase                  |
| 83.4239  | 177.931  | SDH        | Medtr5g020050  | succinate dehydrogenase [ubiquinone] flavoprotein subunit   |
| 31.5611  | 45.7821  | SDHB       | Medtr1g492610  | succinate dehydrogenase [ubiquinone] iron-sulfur subunit    |
| 59.6711  | 80.7958  | SDHB       | Medtr0018s0260 | succinate dehydrogenase [ubiquinone] iron-sulfur subunit    |
| 53.2723  | 28.1818  | ALPHA-SCS2 | Medtr6g077820  | succinyl-CoA ligase [ADP-forming] subunit alpha-2           |
| 12.9651  | 22.6348  | BCCP       | Medtr2g103280  | biotin carboxyl carrier acetyl-CoA carboxylase              |
| 18.1025  | 9.43557  | BCCP       | Medtr6g015020  | biotin carboxyl carrier acetyl-CoA carboxylase              |
| 28.0631  | 14.3313  | BCCP       | Medtr7g013100  | biotin carboxyl carrier acetyl-CoA carboxylase              |
| 144.061  | 71.1014  | BCCP       | Medtr7g080290  | biotin carboxyl carrier acetyl-CoA carboxylase              |
| 74.3424  | 36.076   | ACC        | Medtr8g101330  | acetyl-CoA carboxylase biotin carboxylase subunit           |
| 5.35096  | 1.0041   | accD       | Medtr4g050863  | acetyl-coA carboxylase carboxyltransferase beta subunit     |
| 64.9331  | 119.341  | ACO        | Medtr5g022940  | cytoplasmic-like aconitate hydratase                        |
| 13.7291  | 18.5585  | ACO        | Medtr4g048190  | cytoplasmic-like aconitate hydratase                        |
| 164.29   | 108.477  | PGM        | Medtr8g104540  | cytoplasmic phosphoglucomutase                              |
| 18.7936  | 36.5541  | HPPD       | Medtr5g091060  | 4-hydroxyphenylpyruvate dioxygenase                         |
| 6.32472  | 9.93728  | HPPD       | Medtr5g090980  | 4-hydroxyphenylpyruvate dioxygenase                         |
| 9.35988  | 18.592   | PGLS       | Medtr5g045000  | glucosamine-6-phosphate isomerase/6-phosphogluconolactonase |
| 57.3965  | 19.8764  | PGLS       | Medtr1g028320  | glucosamine-6-phosphate isomerase/6-phosphogluconolactonase |
| 51.7187  | 13.3864  | PGLS       | Medtr1g028330  | glucosamine-6-phosphate isomerase/6-phosphogluconolactonase |
| 159.017  | 116.395  | PGD        | Medtr7g017900  | decarboxylating-like 6-phosphogluconate dehydrogenase       |
| 75.4566  | 53.3728  | PGD        | Medtr8g099185  | decarboxylating-like 6-phosphogluconate dehydrogenase       |
| 6.74328  | 4.37057  | PGDH       | Medtr8g088900  | 6-phosphogluconate dehydrogenase-like protein               |
| 57.4216  | 24.6736  | FH         | Medtr1g087900  | fumarate hydratase                                          |
| 2130.43  | 652.241  | GAPDH      | Medtr3g115920  | glyceraldehyde-3-phosphate dehydrogenase B                  |
| 4855.69  | 1115.1   | GAPDH      | Medtr7g084800  | glyceraldehyde-3-phosphate dehydrogenase                    |
| 0.687058 | 3.07768  | NADP-GAPDH | Medtr1g014320  | NADP-dependent glyceraldehyde-3-phosphate dehydrogenase     |
| 1028.75  | 443.604  | RPE        | Medtr4g108800  | ribulose-phosphate 3-epimerase                              |
| 58.0905  | 27.4291  | Rubisco    | Medtr4g021210  | ribulose biphosphate carboxylase/oxygenase activase         |
| 92.5537  | 29.1866  | Rubisco    | Medtr2g105480  | ribulose biphosphate carboxylase/oxygenase activase         |
| 86.8246  | 5.19883  | RBCS       | Medtr7g007200  | ribulose biphosphate carboxylase small chain                |
| 128.607  | 6.21938  | RBCS       | Medtr7g007120  | ribulose biphosphate carboxylase small chain                |
| 40.1342  | 0.88186  | RBCS       | Medtr7g007230  | ribulose biphosphate carboxylase small chain                |
| 25.8692  | 7.63572  | RBCL       | Medtr4g051270  | ribulose biphosphate carboxylase large chain domain protein |
| 0.780575 | 0.198257 | RBCL       | Medtr6g055010  | ribulose biphosphate carboxylase large chain domain protein |
| 19.7333  | 70.6749  | PEPEC      | Medtr2g092930  | phosphoenolpyruvate carboxylase                             |
| 45.8304  | 66.0523  | PEPEC      | Medtr1g094010  | phosphoenolpyruvate carboxylase                             |
| 38.4137  | 54.632   | PEPEC      | Medtr2g076670  | phosphoenolpyruvate carboxylase                             |
| 57.0682  | 78.2569  | PEPEC      | Medtr1g094000  | phosphoenolpyruvate carboxylase                             |
| 69.6138  | 40.679   | PEPEC      | Medtr8g463920  | phosphoenolpyruvate carboxylase                             |
| 3.28823  | 1.25575  | PEPEC      | Medtr4g079860  | phosphoenolpyruvate carboxylase                             |
| 0.529471 | 1.03165  | PCKA       | Medtr5g430730  | phosphoenolpyruvate carboxykinase [ATP] protein             |
| 3.70197  | 5.69649  | PDC        | Medtr2g015560  | pyruvate decarboxylase                                      |
| 0.339392 | 0.108399 | PDC        | Medtr7g069540  | pyruvate decarboxylase                                      |
| 0.607883 | 0.043344 | PDC        | Medtr2g009330  | pyruvate decarboxylase                                      |
| 0.385012 | 0.159089 | PDC        | Medtr5g046610  | pyruvate decarboxylase                                      |
| 28.2199  | 20.0905  | PK         | Medtr6g004020  | pyruvate kinase family protein                              |
| 54.5871  | 25.9717  | PK         | Medtr1g076540  | pyruvate kinase family protein                              |
| 47.2312  | 18.8652  | PK         | Medtr6g034195  | pyruvate kinase family protein                              |
| 18.1967  | 5.07857  | PK         | Medtr1g105965  | pyruvate kinase family protein                              |
| 1.95628  | 0.242755 | PK         | Medtr4g083340  | pyruvate kinase family protein                              |
| 7.92729  | 25.968   | PPDK       | Medtr4g118350  | pyruvate orthophosphate dikinase                            |
| 20.3592  | 53.9382  | Enolase    | Medtr6g060570  | phosphopyruvate hydratase                                   |
| 339.055  | 243.955  | Enolase    | Medtr7g103620  | phosphopyruvate hydratase                                   |
| 47.4263  | 26.195   | PDK        | Medtr7g024460  | pyruvate dehydrogenase (acetyl-transferring) kinase         |
| 14.3581  | 7.59767  | PDH2       | Medtr3g076630  | pyruvate dehydrogenase E1 beta subunit                      |
| 40.6262  | 60.0095  | PDHA1      | Medtr5g036600  | pyruvate dehydrogenase complex E1 alpha subunit             |
| 312.049  | 89.3826  | GRHPR      | Medtr1g112510  | D-glycerate dehydrogenase/hydroxypyruvate reductase         |
| 0.732055 | 0.155978 | GRHPR      | Medtr4g013135  | D-glycerate dehydrogenase/hydroxypyruvate reductase         |
| 34.4808  | 68.0237  | GRHPR      | Medtr6g007170  | D-glycerate dehydrogenase/hydroxypyruvate reductase         |
